# Supplementary material for: Reporting of lifetime fractures: methodological considerations and results from the Thai Cohort Study
Source: PubMed Central journal article supplement — BMJ Open. 2012 Aug 24;2(4):e001000. doi: 10.1136/bmjopen-2012-001000 (PMC3433778; doi:10.1136/bmjopen-2012-001000), 2012-08-24
Supplement: bmjopen-2012-001000.draft_revisions.pdf [file bmjopen-2012-001000.draft_revisions.pdf]

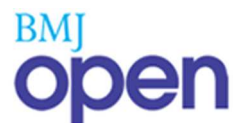

**Reporting of lifetime fractures: methodological considerations and results from the Thai Cohort Study**

|                                 |                                                                                                                                                                                                                                                                                                                                                   |
|---------------------------------|---------------------------------------------------------------------------------------------------------------------------------------------------------------------------------------------------------------------------------------------------------------------------------------------------------------------------------------------------|
| Journal:                        | <i>BMJ Open</i>                                                                                                                                                                                                                                                                                                                                   |
| Manuscript ID:                  | bmjopen-2012-001000                                                                                                                                                                                                                                                                                                                               |
| Article Type:                   | Research                                                                                                                                                                                                                                                                                                                                          |
| Date Submitted by the Author:   | 10-Feb-2012                                                                                                                                                                                                                                                                                                                                       |
| Complete List of Authors:       | Berecki-Gisolf, Janneke; Monash University, Monash Injury Research Institute<br>McClure, Rod; Monash University, Monash Injury Research Institute<br>Seubsman, Sam-ang; Sukhothai Thammathirat Open University, School of Human Ecology<br>Sleigh, Adrian; Australian National University, National Centre for Epidemiology and Population Health |
| <b>Primary Subject Heading</b>: | Epidemiology                                                                                                                                                                                                                                                                                                                                      |
| Secondary Subject Heading:      | Public health, Research methods                                                                                                                                                                                                                                                                                                                   |
| Keywords:                       | fracture survey, Thailand, Thai Cohort Study, incidence                                                                                                                                                                                                                                                                                           |
|                                 |                                                                                                                                                                                                                                                                                                                                                   |

SCHOLARONE™  
Manuscripts

## Reporting of lifetime fractures: methodological considerations and results from the Thai Cohort Study

Authors:

Janneke Berecki-Gisolf<sup>[1]</sup>, Rod McClure<sup>[1]</sup>, Sam-ang Seubsman<sup>[2]</sup>, Adrian Sleight<sup>[3]</sup> and the Thai Cohort Study team

Thai Cohort Study Team:

Thailand: Jaruwan Chokhanapitak, Chaiyun Churewong, Suttanit Hounthasarn, Suwanee

Khamman,

Daoruang Pandee, Suttinan Pangsap, Tippawan Prapamontol, Janya Puengson, Yodyiam

Sangrattanakul, Sam-ang Seubsman, Boonchai Somboonsook, Nintita Sripaiboonkij,

Pathumvadee

Somsamai, Duangkae Vilainerun, Wanee Wimonwattanaphan. Australia: Chris Bain, Emily

Banks,

Cathy Banwell, Bruce Caldwell, Gordon Carmichael, Tarie Dellora, Jane Dixon, Sharon Friel,

David

Harley, Matthew Kelly, Tord Kjellstrom, Lynette Lim, Roderick McClure, Anthony McMichael,

Tanya Mark, Adrian Sleight, Lyndall Strazdins, Vasoontara Yiengprugsawan.

Affiliation and addresses of authors:

[1] Monash Injury Research Institute, Monash University, Melbourne, Australia

1  
2  
3 [2] School of Human Ecology, Sukhothai Thammathirat Open University, Nonthaburi,  
4  
5 Thailand;

6  
7  
8 [3] National Centre for Epidemiology and Population Health, Australian National University,  
9  
10 Canberra, Australia

11  
12  
13  
14  
15 Corresponding author:

16  
17 Janneke Berecki-Gisolf

18  
19 Monash Injury Research Institute,

20  
21 Building 70 Clayton Campus, Monash University

22  
23 3800 Melbourne, Australia

24  
25  
26 Tel. +61 3 99051275 Fax. +61 3 9905 4363

27  
28  
29  
30  
31 Key words: fracture incidence; fracture survey; Thailand; Thai Cohort Study

32  
33 Word count of main text: 2596  
34  
35  
36  
37  
38  
39  
40  
41  
42  
43  
44  
45  
46  
47  
48  
49  
50  
51  
52  
53  
54  
55  
56  
57  
58  
59  
60

## Article summary

### Article focus

- In developing and newly industrialised countries, epidemiological data on fracture incidence usually cannot be derived from large administrative datasets, and estimates must rely on other means.
- The primary aim of this study is to provide estimates of fracture incidence among young adults in Thailand, using the 2009 4-year follow-up survey of a large national Thai cohort study (TCS).
- The secondary aim of this study is to illustrate and to recommend a method for limiting the effect of recall bias.

### Key messages

- The pattern of fracture incidence among adult Thai men and women between 20 and 60 years is similar to that reported for Western countries such as the US and the UK.
- Survey methods provide a feasible alternative for establishing fracture incidence; however, limiting analyses to fractures reported to have occurred recently minimises bias due to poor recall.

### Strengths and limitations

- The strengths of the study are the sample size, the detailed survey question on fractures, and the careful consideration given to recall bias in the analysis.
- The accuracy of self-report studies is by definition limited by the accuracy of participant reporting.
- The gold standard for ascertaining fractures: X-rays and medical records; were not available.

### Structured abstract

**Objectives:** To provide estimates of fracture incidence among young adults in Thailand

**Design:** cross-sectional analysis of a cohort

**Setting:** a national Thai Cohort Study (TCS)

**Participants:** 60,569 study participants responded to the 2009 follow up survey; 55% were women and median age was 34 years (range 19 to 92).

**Primary and secondary outcome measures:** Participants were asked if they had experienced fractures and if so, at what age. Fracture incidence was calculated from lifetime fracture reports, and again selecting only fractures reported to have taken place within the last year.

**Results:** 18010 lifetime fractures were reported; 11645 (65%) by men. Lifetime fracture prevalence was 30% for men and 15% for women. Lifetime incidence per  $10^4$  person years was 83; analysing only fractures from the last year yielded an incidence of 187. For ages 21 to 30, fractures were more common among men than women (283 [95%CI 244 to 326] and

1  
2  
3 150 [130 to 173] per 10<sup>4</sup> person-years, respectively); with increasing age, rates decreased  
4  
5 among men and increased among women (for ages 51 to 60, 97 [58 to 151] and 286 [189 to  
6  
7 417], respectively).  
8  
9

10  
11 **Conclusions:** The pattern of fracture incidence among Thais aged 20 to 60 was similar to  
12  
13 that reported for Western countries. Survey methods provide a feasible alternative for  
14  
15 establishing fracture incidence; however, limiting analyses to fractures reported to have  
16  
17 occurred recently minimises bias due to poor recall.  
18  
19  
20  
21  
22  
23  
24  
25  
26  
27  
28  
29  
30  
31

## 32 Introduction

33  
34  
35 Fractures are an important public health burden. Descriptive epidemiological data on the  
36  
37 incidence and distribution of fractures in the population is relevant for the provision of  
38  
39 health services, identifying trends and informing preventative strategies. Fracture incidence  
40  
41 has been described previously using administrative data, including X-ray reports,[1-4] and  
42  
43 using survey data[5], with widely varying results. Administrative datasets of patients  
44  
45 attending outpatient fracture clinics have the advantage of accurate fracture ascertainment,  
46  
47 but do not capture patients admitted to hospital, patients treated in primary care or  
48  
49 fractures that do not result in medical intervention[5]. Furthermore, to determine fracture  
50  
51 incidence based on (administrative) hospital data, an estimate of the hospital catchment  
52  
53 population is required, which may not be accurate. Survey data capture all fractures  
54  
55  
56  
57  
58  
59  
60

1  
2  
3 regardless of medical intervention, but rely on accurate recall of the event by the study  
4  
5 participants. Self-report of life events is prone to telescoping (inaccurately reporting distant  
6  
7 events as having occurred more recently) and fall-off (events reported in previous surveys  
8  
9 may, in subsequent surveys, not be reported as having ever occurred)[6].  
10  
11

12  
13 In developing countries and newly industrialised countries, large administrative datasets of  
14  
15 routinely collected medical information may not be readily available and estimates of  
16  
17 fracture incidence must rely on other means. In this study we aim to provide estimates of  
18  
19 fracture incidence among young adults in Thailand, using the 2009 4-year follow-up survey  
20  
21 of a large national Thai cohort study (TCS). Recognising the importance of survey data in  
22  
23 establishing fracture incidence in developing and newly industrialised countries, we present  
24  
25 a method for quantifying and resolving the effect of poor recall on self-reported lifetime  
26  
27 fracture incidence.  
28  
29  
30  
31

## 32 **Methods**

### 33 **Study population and data collection**

34  
35  
36  
37  
38 The data derived from the 2009 follow-up survey of the Thai Cohort Study (TCS), which is an  
39  
40 ongoing community-based study of adult distance learning Sukhothai Thammathirat Open  
41  
42 University (STOU) students residing throughout the country. In 2005 the STOU student  
43  
44 register listed about 200,000 names and addresses: a baseline 20-page questionnaire was  
45  
46 sent to each student and 87,134 (44%) replied. The baseline characteristics of cohort  
47  
48 participants[7] and comparisons with the population of Thailand[8-9] have been reported  
49  
50 previously: the STOU cohort has a higher proportion of females than the general Thai  
51  
52 population (54.7 vs. 50.5%); more young adults (51.5 vs. 23.9% were aged between 21 and  
53  
54 30 years) and fewer people aged over 50 (2.0 vs. 24.7%)[8]; the age distribution of the Thai  
55  
56  
57  
58  
59  
60

1  
2  
3 population and the STOU cohort are shown in Figure 1. Study participants were also less  
4  
5 likely to be married and more likely to have completed junior high school; geographically  
6  
7 the main regions in Thailand are well represented in the STOU cohort[8]. Overall the cohort  
8  
9 represents well the geo-demographic, ethnic, occupational and socioeconomic status of the  
10  
11 young-adult Thai population. This is because most Open University students already have  
12  
13 established jobs and because of their work and family responsibilities and modest economic  
14  
15 circumstances are unable to leave their locations to attend an on-campus university  
16  
17 fulltime. However, they are better educated than the general Thai population and thus are  
18  
19 able to respond to complex health questionnaires. In 2009, a follow-up survey was sent and  
20  
21 60,569 (>70%) participants replied: 55% were women and the median age was 34 years  
22  
23 (range 19 to 92). Data scanning, verifying, and correcting were conducted using Scandevet, a  
24  
25 program developed by a research team from Khon Kaen University. Further data editing was  
26  
27 completed using SQL and SPSS software.  
28  
29

### 30 31 32 33 34 Ethical considerations

35  
36  
37 Ethics approval was obtained from Sukhothai Thammathirat Open University Research and  
38  
39 Development Institute (protocol 0522/10) and the Australian National University Human  
40  
41 Research Ethics Committee (protocol 2004344). Informed written consent was obtained  
42  
43 from all participants.  
44  
45

### 46 47 48 Measures

49  
50  
51 The core question asked was "In your life have you ever experienced a fracture to the areas  
52  
53 of your body mentioned below? If so please place a cross in the Yes box and indicate the age  
54  
55 at which the fracture occurred" followed by a list: Finger/toe; wrist; arm; collarbone; rib;  
56  
57  
58  
59  
60



1  
2  
3 skull; face/jaw/nose; neck; back; pelvis; leg; ankle; other. Skull fractures may have been  
4  
5 over-reported (by being confused with skull trauma) and as this is the subject of further  
6  
7 investigation skull fractures are not included in this report. Other variables included in this  
8  
9 analysis are age and gender. Participant age was divided into bands of 10 years (21-30, 31-  
10  
11 40, 41-50, 51-60 and 61-70). Age-category analyses presented here excluded 7 cohort  
12  
13 members aged less than 21 years as they were too few in number to reliably represent that  
14  
15 age group; generally, age groups with very small numbers of people in them were not  
16  
17 presented in the age-specific results to prevent distorting age effects by selection bias (i.e.  
18  
19 only relatively healthy and active older persons participating in the study).  
20  
21  
22  
23

#### 24 25 Analysis

26  
27  
28 Only fractures that were reported together with an age at the time of fracture were  
29  
30 included in the analysis. Lifetime prevalence of fractures was calculated as the percentage  
31  
32 of participants who reported ever having had a fracture. Lifetime incidence of fractures per  
33  
34 100,000 person-years was calculated by dividing the number of reported fractures by the  
35  
36 sum of the ages of all study participants, and multiplying by 100,000. Fracture incidence was  
37  
38 also calculated using a range of recall periods: for example, for a recall period of 10 years,  
39  
40 only fractures that were reported to have occurred within the last 10 years were included in  
41  
42 the incidence calculation, and the denominator was the number of study participants  
43  
44 multiplied by 10 (to account for 10 years of recall). Confidence intervals for the incidence  
45  
46 rates were calculated by first assuming fracture occurrence to have a Poisson distribution,  
47  
48 and finding its related confidence interval[10]. Differences in recall for leg vs. finger/toe  
49  
50 fractures were calculated using a Z-test for two proportions: the reported number of  
51  
52  
53  
54  
55  
56  
57  
58  
59  
60

fractures over 10 years divided by the expected number of fractures based on 1-year recall multiplied by 10. All analyses were conducted using SAS software, version 9.2.

## Results

The 60569 Thai Cohort Study participants who responded to the 2009 survey reported a total of 18280 lifetime fractures; age at the time of fractures was included for 18010 (99%) of these. The overall lifetime prevalence of ever having sustained any fracture was 22%: there were 47445 (78%) participants who did not report any fracture; 9964 (16%) who reported a fracture at one site; 2146 (4%) who reported a fracture at two sites and 1014 (2%) who reported fractures at three or more sites. The distribution of the age-at-fracture as well as the overall study participant age distribution is shown in Figure 1. Among participants below the age of 40, women are in the majority; above 40 years men are in the majority. Although there are more women than men in the study, 65% (11645/18010) of all fractures were reported by men. There was over-reporting of fractures at rounded ages such as 25, 30, 35 and 40 as well as 18 years (Figure 1, bottom); a more natural distribution can be achieved by using a 5-year interval scale.

Table 1. Lifetime prevalence of fractures in Thai cohort members by age and sex.

| Age group    | Lifetime prevalence of fractures       |                |                                        |                |
|--------------|----------------------------------------|----------------|----------------------------------------|----------------|
|              | Men                                    |                | Women                                  |                |
|              | Ever had a fracture / number of people | Prevalence (%) | Ever had a fracture / number of people | Prevalence (%) |
| 21-30        | 1833 / 6688                            | 27             | 1743 / 13003                           | 13             |
| 31-40        | 3527 / 11519                           | 31             | 2038 / 13174                           | 15             |
| 41-50        | 2128 / 6883                            | 31             | 948 / 5956                             | 16             |
| 51-60        | 588 / 1965                             | 30             | 197 / 943                              | 21             |
| 61-70        | 89 / 300                               | 30             | 18 / 74                                | 24             |
| <i>Total</i> | <i>8165 / 27355</i>                    | <i>30</i>      | <i>4944 / 33150</i>                    | <i>15</i>      |

1  
2  
3 The prevalence of fractures among men in their 20s and 30s was twice as high as that of  
4  
5 women of the same age group (Table 1). Having sustained a fracture was more common  
6  
7 among women in their 50s and 60s than among younger women; among men, there was no  
8  
9 marked difference between the age groups.  
10  
11  
12  
13  
14  
15  
16  
17  
18  
19  
20  
21  
22  
23  
24  
25  
26  
27  
28  
29  
30  
31  
32  
33  
34  
35  
36  
37  
38  
39  
40  
41  
42  
43  
44  
45  
46  
47  
48  
49  
50  
51  
52  
53  
54  
55  
56  
57  
58  
59  
60

For peer review only

Table 2. Fracture incidence calculated from lifetime fractures and from fractures reported for the last year only

| Fracture site | Lifetime fractures  |                   | Fractures in the last year |                   |
|---------------|---------------------|-------------------|----------------------------|-------------------|
|               | Number of fractures | Crude incidence * | Number of fractures        | Crude incidence † |
| Finger/toe    | 3519                | 163               | 268                        | 442               |
| Wrist         | 1995                | 92                | 98                         | 162               |
| Arm           | 2967                | 137               | 76                         | 125               |
| Collarbone    | 1571                | 73                | 62                         | 102               |
| Rib           | 514                 | 24                | 53                         | 88                |
| Face/Jaw/Nose | 1006                | 47                | 47                         | 78                |
| Neck          | 213                 | 10                | 21                         | 35                |
| Back          | 610                 | 28                | 73                         | 121               |
| Pelvis        | 270                 | 13                | 19                         | 31                |
| Leg           | 2007                | 93                | 108                        | 178               |
| Ankle         | 2051                | 95                | 171                        | 282               |
| Other         | 1287                | 60                | 134                        | 221               |
| <i>Total</i>  | <i>18010</i>        | <i>834</i>        | <i>1130</i>                | <i>1866</i>       |

\* Calculated over 2159580 person years. † Calculated over 60569 person years.

Note: Fracture incidence expressed per 100,000 person-years. The lifetime fracture crude incidence includes childhood fractures; the fractures in the last year do not (as the youngest study participant is 19 years).

The fracture incidence per 100,000 person years by fractures site is given in Table 2.

Finger/toe, arm and ankle fractures were the most common; pelvis and neck fractures the least common. Counting only fractures that occurred in the year prior to the survey resulted in a much higher fracture incidence for most fracture sites. Lifetime fracture incidence includes childhood fractures and relies on accurate recall over a lifetime; fractures over the

1  
2  
3 last year, on the other hand, are derived from recent events, and because the youngest  
4  
5 participants were 19 years, childhood fractures are not included.  
6  
7

8  
9 This is further illustrated in Figure 2: calculating fracture incidence over a longer recall  
10  
11 period resulted in a lower fracture incidence; this effect is seen both in men and women,  
12  
13 and across all age groups. The decline in incidence when calculated over longer recall  
14  
15 periods is greater for less memorable fractures such as finger/toe, than for fractures  
16  
17 associated with significance inconvenience such as leg fractures. If true fracture incidence  
18  
19 remained constant over time then based on the number of fractures reported to have  
20  
21 occurred in the last year, we might expect  $268 \times 10 \text{ years} = 2680$  finger/toe fractures and  
22  
23  $108 \times 10 \text{ years} = 1080$  leg fractures to have occurred over the preceding 10 years. The actual  
24  
25 number of reported finger/toe fractures over the preceding 10 years was 1487; this is 55%  
26  
27 (95% CI 54 to 57) of the expected number; the actual number of reported leg fractures over  
28  
29 the preceding 10 years was 698; this is 65% (95%CI 62 to 67) of the expected number.  
30  
31

32  
33 Assuming steady fracture rates over time, 10-year recall was statistically significantly lower  
34  
35 for finger/toe compared to leg fractures (z-value = 5.1).  
36  
37

38  
39 Because the fracture incidence declined when calculated over increasing length of recall, for  
40  
41 further analyses only fractures reported to have occurred in the last year were used.  
42  
43

44  
45 Fracture incidence per age group for men and women is shown in Figure 3: fractures were  
46  
47 more common among young men than among young women; with increasing age, among  
48  
49 men the fracture incidence decreased whereas among women fracture incidence increased.  
50

51  
52 Among women above 50 years, fracture incidence was higher than that among men of  
53  
54 above 50 years.  
55  
56  
57  
58  
59  
60

## Discussion

This study reports the fracture incidence among Thais aged between 20 and 60: fractures are common, particularly among men under 40 and women above 50 years. The increase in the incidence of fractures between the ages of 20 and 60 among women and the simultaneous decrease among men seen in this Thai study have been reported previously in studies from the UK[1, 4-5], US[2], and Norway[3]. Men in their 20s have previously been reported to have a much higher incidence of fractures than women: this gender difference gradually disappears with age[1-5, 11], as also seen in the present Thai study.

Two ways in which the pattern of fracture incidence among adult Thais presented here differs from reports from Western studies are, first, the age of onset of a steep increase in fracture rates among women: this is manifest among the 51-60 year old Thais, but in some reports from Western countries[4, 12-13] a steep increase is not apparent until after the age of 65-70 years. This steep increase among older women generally reflects osteoporosis: the present results could therefore indicate earlier onset of osteoporosis among Thai women. The second discrepancy is the observed decrease in fractures between the ages of 40 and 60 among Thai men: in some previous reports from Western countries, fracture incidence remains steady or increases slightly between the ages of 40 and 60[3, 11-12, 14]. Possibly the decrease in fracture rates after age 20-25 seen among Western men is not manifest among Thai men until much later because of continued high-risk physical labour; the decrease in fractures after the age of 40 could reflect a transitioning out of high-risk work around that age.

The absolute fracture incidence of the present study is by and large comparable to previous studies that were based on medical records and X-ray reports: some studies reported lower

1  
2  
3 incidence[1, 11-12, 14] and others reported similar rates[3-4, 13]. A recent UK study using a  
4  
5 self-report survey reported a fracture incidence twice as high as those presented in this Thai  
6  
7 study[5]: whether this reflects higher fracture rates or better recall in the UK remains to be  
8  
9 investigated.

10  
11  
12 The prevalence of osteoporosis among both men and women in Thailand is reported to be  
13  
14 comparable to that of Western countries, but despite the development osteoporosis  
15  
16 management guidelines, most high-risk individuals and fracture patients are not identified  
17  
18 or treated[15]. Younger Thai men and women living in rural areas have been reported to  
19  
20 have higher bone mineral density compared to their urban counterparts[16]; ongoing  
21  
22 urbanisation can therefore be expected to lead to an increase in the incidence of  
23  
24 osteoporosis and related fractures. Vertebral fractures, which are commonly associated  
25  
26 with osteoporosis, have been reported to be remarkably common among older Thai men  
27  
28 and women, with incidence rates among Thai women 3-4 fold, and among Thai men 10 fold  
29  
30 higher compared to white women and men, respectively[17]. This pattern might be due to  
31  
32 trauma and micro-trauma associated with strenuous work among (older) Thai men. The  
33  
34 results of the present Thai community-based study show high fracture rates among younger  
35  
36 men and older women; the relative contribution of osteoporosis to fracture incidence per  
37  
38 age-group and gender in Thailand remains to be clarified.

39  
40 This study has several limitations. The study sample did not include adequate  
41  
42 representation of all age groups to allow for population based age-standardised incidence  
43  
44 calculations. Because fracture incidence is generally described as two-peaked, with greatest  
45  
46 incidence in the young and the elderly[1-3, 5], the fracture incidence presented in this study  
47  
48 is an under-estimate of that of the general Thai population, as the young (<20) are not  
49  
50  
51  
52  
53  
54  
55  
56  
57  
58  
59  
60

1  
2  
3 represented and the elderly (61+, n=431) are under-represented. The findings of this study  
4  
5 are therefore limited to Thais between the ages of 20 and 60.  
6  
7

8  
9 The accuracy of self-report studies is by definition limited by the accuracy of participant  
10  
11 reporting. A comparison of self-report with X-ray reports (the gold standard) was not  
12  
13 feasible. Instead, we have attempted to quantify self-report (in-) accuracy in two other  
14  
15 ways: first, by showing over-reporting of fractures at rounded ages (Fig. 1). This  
16  
17 phenomenon distorts the time distribution rather than the overall number of reported  
18  
19 events. The second self-report inaccuracy we have attempted to quantify refers to fall-off:  
20  
21 the more accurate recall of recent events compared to events that occurred longer ago. The  
22  
23 results of the present study clearly indicate a decline in fracture incidence when calculated  
24  
25 over an increasing number of years. Although this pattern appears to be general across age  
26  
27 and gender, the magnitude of 'recall inaccuracy' depends on the severity of the event, with  
28  
29 leg fractures being recalled more accurately than finger/toe fractures. These results,  
30  
31 however, should be interpreted with caution as the decline in incidence with increasing  
32  
33 recall period could in part be explained by a real increase in fracture incidence over time.  
34  
35 Thailand is transitioning to a modern consumer economy[9] which could be leading to an  
36  
37 increase in fractures due to traffic and workplace injury. Baseline frequencies of  
38  
39 transport[18] and other injuries[19] from the 2005 survey of the Thai Cohort Study have  
40  
41 been reported; the change in injury incidence and fracture incidence over time is ground for  
42  
43 further study. Regardless of the underlying change over time, using only the last year of  
44  
45 recall to calculate incidence is the most accurate and timely representation of fracture  
46  
47 incidence; furthermore, it facilitates comparisons with other studies reporting 12-months  
48  
49 recall of fractures.  
50  
51  
52  
53  
54  
55  
56  
57  
58  
59  
60



## Conclusions

In conclusion, the results of this study indicate that the pattern of fracture incidence among adult Thai men and women between 20 and 60 years is similar to that reported for Western countries such as the US and the UK. Self-report surveys provide a feasible alternative to hospital-records and X-ray records research for establishing fracture incidence; however, where lifetime fractures are reported, using only fractures reported to have occurred in the last year minimises bias due to poor recall. Overall, we see fracture in Thailand is a larger burden for younger men and older women but we need more background information before we can understand better the environmental and personal factors that account for this age and sex pattern of occurrence. Such analyses will be the focus of future reports from the Thai Cohort Study.

## Competing Interests

The authors declare that they have no competing interests.

## Authors' contributions

JG and RM analysed the data and conceptualized and drafted the manuscript. SS and AS designed and instituted the Thai Health-Risk Transition research project and helped the data analysis and interpretation for this report. All authors read and approved the final manuscript.

## Funding

This work was supported by the International Collaborative Research Grants Scheme with joint grants from the Wellcome Trust UK (GR071587MA) and the Australian National Health and Medical Research Council (NHMRC)(268055), and as a global health grant from the NHMRC (585426). We thank the staff at Sukhothai Thammathirat Open University (STOU)

1  
2  
3 who assisted with student contact and the STOU students who are participating in the  
4  
5 cohort study. We also thank Dr Bandit Thinkamrop and his team from Khon Kaen University  
6  
7 for guiding us successfully through the complex data processing.  
8  
9

## 10 References

- 11  
12  
13 1. Donaldson LJ, Cook A, Thomson RG. Incidence of fractures in a geographically defined  
14  
15 population. *J Epidemiol Community Health*. 1990;**44**:241-5.  
16
- 17  
18 2. Fife D, Barancik JI. Northeastern Ohio Trauma Study III: incidence of fractures. *Ann Emerg*  
19  
20 *Med*. 1985;**14**:244-8.  
21
- 22  
23 3. Sahlin Y. Occurrence of fractures in a defined population: a 1-year study. *Injury*.  
24  
25 1990;**21**:158-60.  
26
- 27  
28 4. Johansen A, Evans RJ, Stone MD, et al. Fracture incidence in England and Wales: a study  
29  
30 based on the population of Cardiff. *Injury*. 1997;**28**:655-60.  
31
- 32  
33 5. Donaldson LJ, Reckless IP, Scholes S, et al. The epidemiology of fractures in England. *J*  
34  
35 *Epidemiol Community Health*. 2008;**62**:174-80.  
36
- 37  
38 6. Pachana NA, Brilleman SL, Dobson AJ. Reporting of life events over time: Methodological  
39  
40 issues in a longitudinal sample of women. *Psychol Assess*. 2011;**23**:277-81.  
41
- 42  
43 7. Seubsman SA, Lim LL, Banwell C, et al. Socioeconomic status, sex, and obesity in a large  
44  
45 national cohort of 15-87-year-old open university students in Thailand. *J Epidemiol*. 2010;**20**:13-20.  
46
- 47  
48 8. Seubsman SA, Yiengprugsawan V, Sleigh A. A large national Thai Cohort Study of the Health-  
49  
50 Risk Transition based on Sukhothai Thammathirat Open University students. *ASEAN Journal of Open*  
51  
52 *Distance Learning*. 2010 (In press).  
53
- 54  
55 9. Sleigh AC, Seubsman SA, Bain C. Cohort profile: The Thai Cohort of 87,134 Open University  
56  
57 students. *Int J Epidemiol*. 2008;**37**:266-72.  
58
- 59  
60 10. Altman DGM, D.; Bryant, T.N.; Gardner, M.J., editor. *Statistics with confidence*. 2nd ed.  
Bristol: BMJ Books; 2000.

- 1  
2  
3 11. Jones G, Cooley HM. Symptomatic fracture incidence in those under 50 years of age in  
4 southern Tasmania. *J Paediatr Child Health*. 2002;**38**:278-83.
- 5  
6  
7 12. Cooley H, Jones G. A population-based study of fracture incidence in southern Tasmania:  
8 lifetime fracture risk and evidence for geographic variations within the same country. *Osteoporos*  
9  
10  
11  
12 *Int*. 2001;**12**:124-30.
- 13  
14 13. Melton LJ, 3rd, Crowson CS, O'Fallon WM. Fracture incidence in Olmsted County, Minnesota:  
15 comparison of urban with rural rates and changes in urban rates over time. *Osteoporos Int*.  
16  
17  
18 1999;**9**:29-37.
- 19  
20 14. Sanders KM, Seeman E, Ugoni AM, et al. Age- and gender-specific rate of fractures in  
21  
22  
23 Australia: a population-based study. *Osteoporos Int*. 1999;**10**:240-7.
- 24  
25 15. Pongchaiyakul C, Songpattanasilp T, Taechakraichana N. Burden of osteoporosis in Thailand.  
26  
27  
28 *J Med Assoc Thai*. 2008;**91**:261-7.
- 29  
30 16. Pongchaiyakul C, Nguyen TV, Kosulwat V, et al. Effect of urbanization on bone mineral  
31  
32  
33 density: a Thai epidemiological study. *BMC Musculoskelet Disord*. 2005;**6**:5.
- 34  
35 17. Jitapunkul S, Thamarpirat J, Chaiwanichsiri D, et al. Incidence of vertebral fractures in Thai  
36  
37  
38 women and men: a prospective population-based study. *Geriatr Gerontol Int*. 2008;**8**:251-8.
- 39  
40 18. Stephan K, Kelly M, McClure R, et al. Distribution of transport injury and related risk  
41  
42  
43 behaviours in a large national cohort of Thai adults. *Accid Anal Prev*. 2011;**43**:1062-7.
- 44  
45 19. Stephan K, McClure R, Seubsman SA, et al. Review of injuries over a one year period among  
46  
47  
48 87,134 adults studying at an open university in Thailand. *Southeast Asian J Trop Med Public Health*.  
49  
50  
51  
52  
53  
54  
55  
56  
57  
58  
59  
60 2010;**41**:1220-30.

1  
2  
3 Figure Legends  
4  
5  
6  
7

8 Figure 1. Top: Histogram of Thai population age distribution according to the 2005 US  
9 Census Bureau International Data Base  
10 (<http://www.census.gov/population/international/data/idb/country.php>, accessed on July  
11 18<sup>th</sup> 2011). Middle: Histogram of Thai Cohort Study participant age. Bottom: Histogram of  
12 the total lifetime fractures reported by Thai Cohort Study participants: over-reporting of  
13 fractures can be seen at ages such as 10, 15, 18, 25, 30, 35 and 40  
14  
15  
16  
17  
18  
19  
20  
21  
22

23 Figure 2. Fracture incidence calculated using a recall period of 1 through to 10 years. Results  
24 are shown for fractures that were reported to occur between the ages 20 to 30, 30 to 40  
25 and 40 to 50.  
26  
27  
28  
29  
30  
31  
32

33 Figure 3. Overall fracture incidence for men and women for a recall period of one year. Error  
34 bars represent 95% confidence intervals.  
35  
36  
37  
38  
39  
40  
41  
42  
43  
44  
45  
46  
47  
48  
49  
50  
51  
52  
53  
54  
55  
56  
57  
58  
59  
60

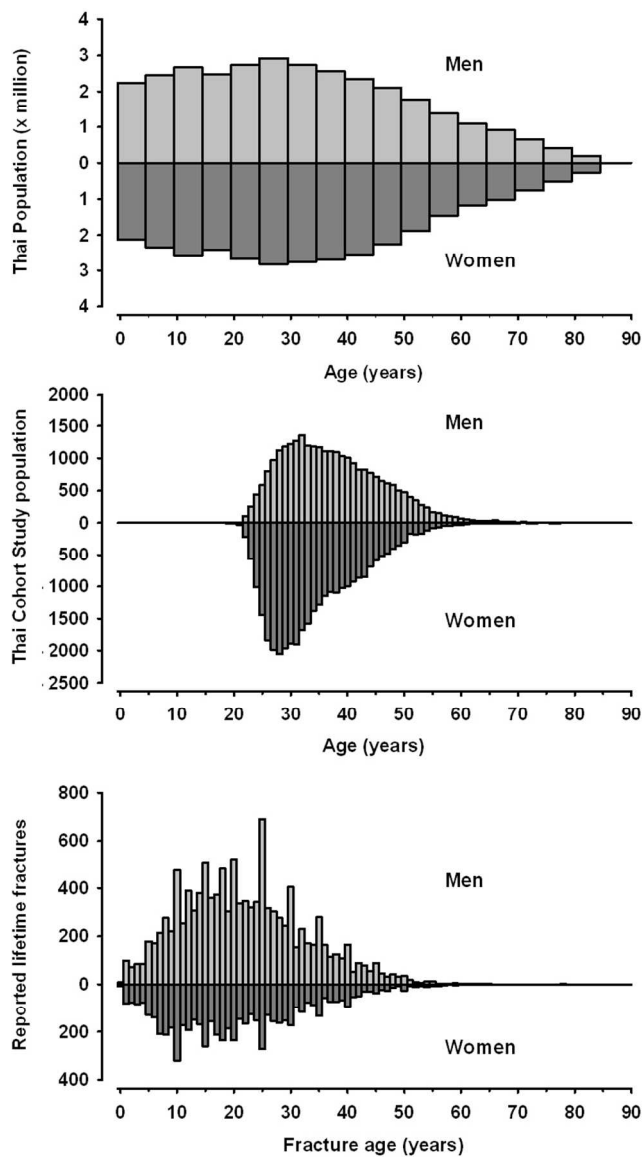

Figure 1. Top: Histogram of Thai population age distribution according to the 2005 US Census Bureau International Data Base (<http://www.census.gov/population/international/data/idb/country.php>, accessed on July 18th 2011). Middle: Histogram of Thai Cohort Study participant age. Bottom: Histogram of the total lifetime fractures reported by Thai Cohort Study participants: over-reporting of fractures can be seen at ages such as 10, 15, 18, 25, 30, 35 and 40  
140x256mm (150 x 150 DPI)

1  
2  
3  
4  
5  
6  
7  
8  
9  
10  
11  
12  
13  
14  
15  
16  
17  
18  
19  
20  
21  
22  
23  
24  
25  
26  
27  
28  
29  
30  
31  
32  
33  
34  
35  
36  
37  
38  
39  
40  
41  
42  
43  
44  
45  
46  
47  
48  
49  
50  
51  
52  
53  
54  
55  
56  
57  
58  
59  
60

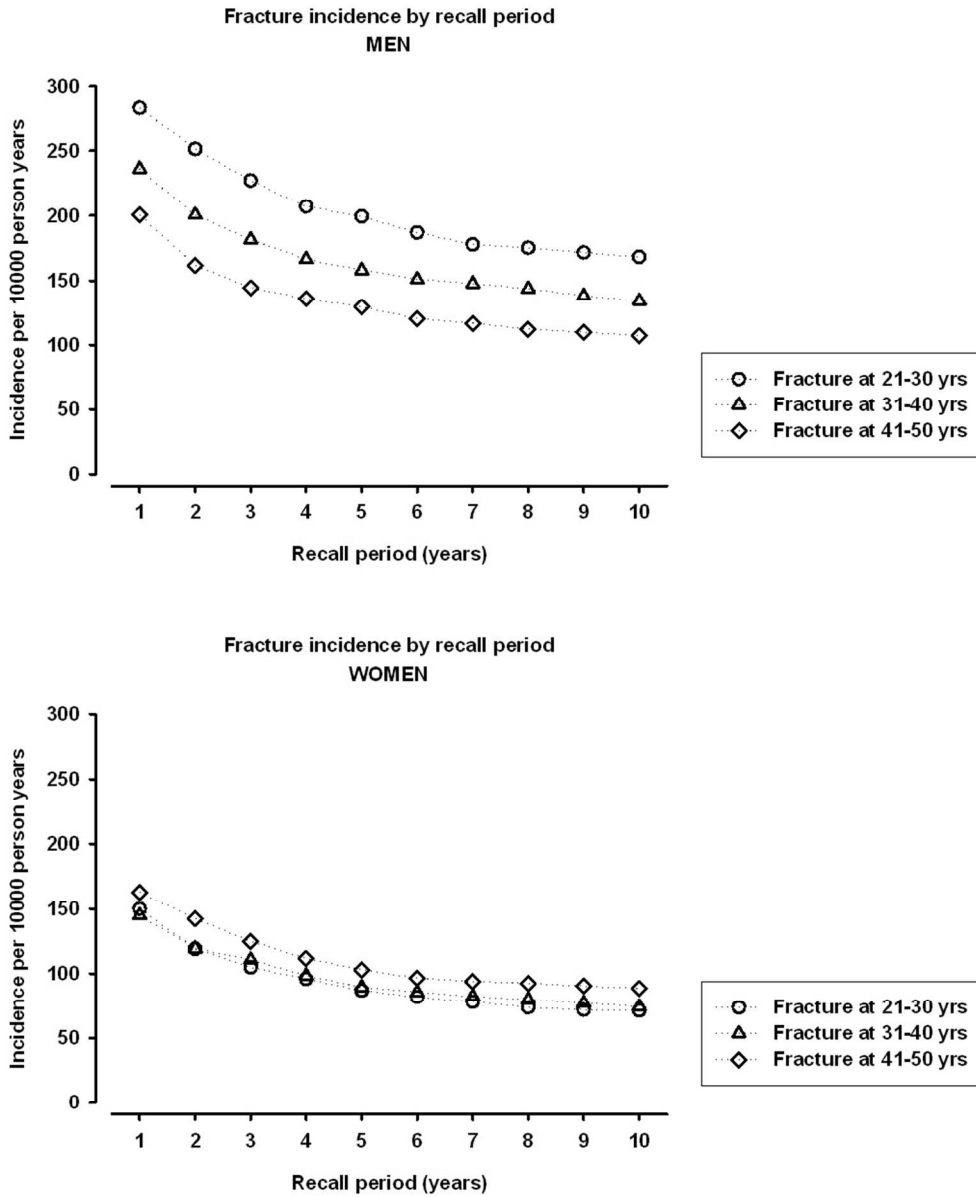

Figure 2. Fracture incidence calculated using a recall period of 1 through to 10 years. Results are shown for fractures that were reported to occur between the ages 20 to 30, 30 to 40 and 40 to 50.  
173x210mm (150 x 150 DPI)

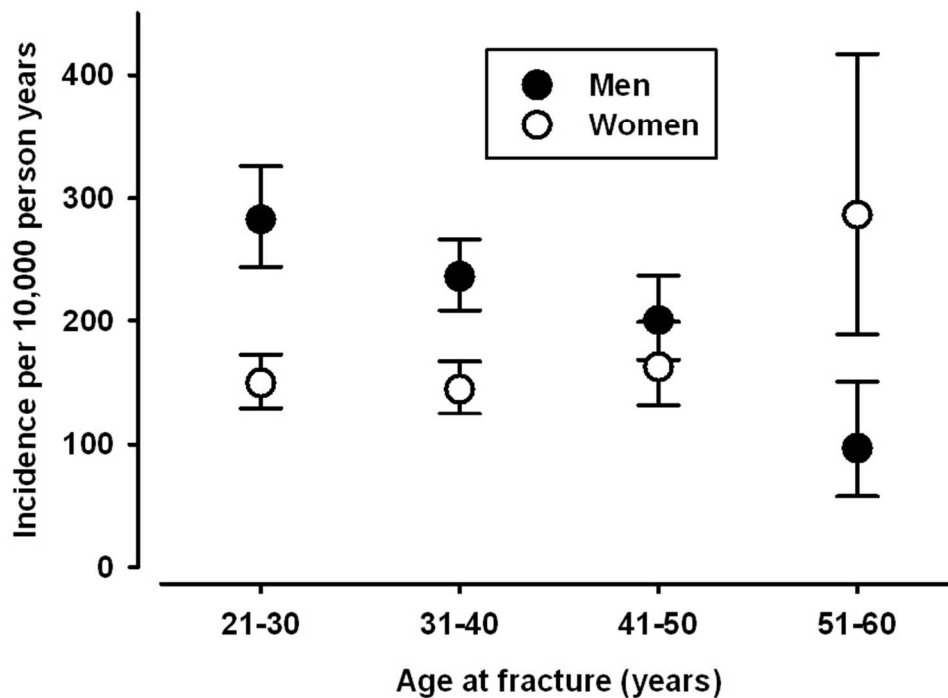

Figure 3. Overall fracture incidence for men and women for a recall period of one year. Error bars represent 95% confidence intervals.

160x124mm (150 x 150 DPI)

**STROBE 2007 (v4) checklist of items to be included in reports of observational studies in epidemiology\***  
**Checklist for cohort, case-control, and cross-sectional studies (combined)**

| Section/Topic             | Item # | Recommendation                                                                                                                                                                                                                                                                                                                                                                                                                                                         | Reported on page # |
|---------------------------|--------|------------------------------------------------------------------------------------------------------------------------------------------------------------------------------------------------------------------------------------------------------------------------------------------------------------------------------------------------------------------------------------------------------------------------------------------------------------------------|--------------------|
| Title and abstract        | 1      | (a) Indicate the study's design with a commonly used term in the title or the abstract                                                                                                                                                                                                                                                                                                                                                                                 | 5                  |
|                           |        | (b) Provide in the abstract an informative and balanced summary of what was done and what was found                                                                                                                                                                                                                                                                                                                                                                    | 5                  |
| <b>Introduction</b>       |        |                                                                                                                                                                                                                                                                                                                                                                                                                                                                        |                    |
| Background/rationale      | 2      | Explain the scientific background and rationale for the investigation being reported                                                                                                                                                                                                                                                                                                                                                                                   | 6                  |
| Objectives                | 3      | State specific objectives, including any pre-specified hypotheses                                                                                                                                                                                                                                                                                                                                                                                                      | 6                  |
| <b>Methods</b>            |        |                                                                                                                                                                                                                                                                                                                                                                                                                                                                        |                    |
| Study design              | 4      | Present key elements of study design early in the paper                                                                                                                                                                                                                                                                                                                                                                                                                | 8                  |
| Setting                   | 5      | Describe the setting, locations, and relevant dates, including periods of recruitment, exposure, follow-up, and data collection                                                                                                                                                                                                                                                                                                                                        | 8                  |
| Participants              | 6      | (a) <i>Cohort study</i> —Give the eligibility criteria, and the sources and methods of selection of participants. Describe methods of follow-up<br><i>Case-control study</i> —Give the eligibility criteria, and the sources and methods of case ascertainment and control selection. Give the rationale for the choice of cases and controls<br><i>Cross-sectional study</i> —Give the eligibility criteria, and the sources and methods of selection of participants | 7                  |
|                           |        | (b) <i>Cohort study</i> —For matched studies, give matching criteria and number of exposed and unexposed<br><i>Case-control study</i> —For matched studies, give matching criteria and the number of controls per case                                                                                                                                                                                                                                                 |                    |
| Variables                 | 7      | Clearly define all outcomes, exposures, predictors, potential confounders, and effect modifiers. Give diagnostic criteria, if applicable                                                                                                                                                                                                                                                                                                                               | 8-9                |
| Data sources/ measurement | 8*     | For each variable of interest, give sources of data and details of methods of assessment (measurement). Describe comparability of assessment methods if there is more than one group                                                                                                                                                                                                                                                                                   | 8-9                |
| Bias                      | 9      | Describe any efforts to address potential sources of bias                                                                                                                                                                                                                                                                                                                                                                                                              | 9                  |
| Study size                | 10     | Explain how the study size was arrived at                                                                                                                                                                                                                                                                                                                                                                                                                              | 7                  |
| Quantitative variables    | 11     | Explain how quantitative variables were handled in the analyses. If applicable, describe which groupings were chosen and why                                                                                                                                                                                                                                                                                                                                           | 7-9                |
| Statistical methods       | 12     | (a) Describe all statistical methods, including those used to control for confounding                                                                                                                                                                                                                                                                                                                                                                                  | 9                  |
|                           |        | (b) Describe any methods used to examine subgroups and interactions                                                                                                                                                                                                                                                                                                                                                                                                    | 9                  |
|                           |        | (c) Explain how missing data were addressed                                                                                                                                                                                                                                                                                                                                                                                                                            | 9                  |
|                           |        | (d) <i>Cohort study</i> —If applicable, explain how loss to follow-up was addressed<br><i>Case-control study</i> —If applicable, explain how matching of cases and controls was addressed                                                                                                                                                                                                                                                                              | n/a                |



|                          |     |                                                                                                                                                                                                              |       |
|--------------------------|-----|--------------------------------------------------------------------------------------------------------------------------------------------------------------------------------------------------------------|-------|
|                          |     | <i>Cross-sectional study</i> —If applicable, describe analytical methods taking account of sampling strategy                                                                                                 |       |
|                          |     | (e) Describe any sensitivity analyses                                                                                                                                                                        | 9     |
| <b>Results</b>           |     |                                                                                                                                                                                                              |       |
| Participants             | 13* | (a) Report numbers of individuals at each stage of study—eg numbers potentially eligible, examined for eligibility, confirmed eligible, included in the study, completing follow-up, and analysed            | 9-10  |
|                          |     | (b) Give reasons for non-participation at each stage                                                                                                                                                         | n/a   |
|                          |     | (c) Consider use of a flow diagram                                                                                                                                                                           | -     |
| Descriptive data         | 14* | (a) Give characteristics of study participants (eg demographic, clinical, social) and information on exposures and potential confounders                                                                     | 9-10  |
|                          |     | (b) Indicate number of participants with missing data for each variable of interest                                                                                                                          | 9     |
|                          |     | (c) <i>Cohort study</i> —Summarise follow-up time (eg, average and total amount)                                                                                                                             | -     |
| Outcome data             | 15* | <i>Cohort study</i> —Report numbers of outcome events or summary measures over time                                                                                                                          | -     |
|                          |     | <i>Case-control study</i> —Report numbers in each exposure category, or summary measures of exposure                                                                                                         |       |
|                          |     | <i>Cross-sectional study</i> —Report numbers of outcome events or summary measures                                                                                                                           | 9-10  |
| Main results             | 16  | (a) Give unadjusted estimates and, if applicable, confounder-adjusted estimates and their precision (eg, 95% confidence interval). Make clear which confounders were adjusted for and why they were included |       |
|                          |     | (b) Report category boundaries when continuous variables were categorized                                                                                                                                    | 9-11  |
|                          |     | (c) If relevant, consider translating estimates of relative risk into absolute risk for a meaningful time period                                                                                             |       |
| Other analyses           | 17  | Report other analyses done—eg analyses of subgroups and interactions, and sensitivity analyses                                                                                                               | 9-11  |
| <b>Discussion</b>        |     |                                                                                                                                                                                                              |       |
| Key results              | 18  | Summarise key results with reference to study objectives                                                                                                                                                     | 10    |
| Limitations              | 19  | Discuss limitations of the study, taking into account sources of potential bias or imprecision. Discuss both direction and magnitude of any potential bias                                                   | 13-14 |
| Interpretation           | 20  | Give a cautious overall interpretation of results considering objectives, limitations, multiplicity of analyses, results from similar studies, and other relevant evidence                                   | 15    |
| Generalisability         | 21  | Discuss the generalisability (external validity) of the study results                                                                                                                                        | 14    |
| <b>Other information</b> |     |                                                                                                                                                                                                              |       |
| Funding                  | 22  | Give the source of funding and the role of the funders for the present study and, if applicable, for the original study on which the present article is based                                                | 15-16 |

\*Give information separately for cases and controls in case-control studies and, if applicable, for exposed and unexposed groups in cohort and cross-sectional studies.

**Note:** An Explanation and Elaboration article discusses each checklist item and gives methodological background and published examples of transparent reporting. The STROBE checklist is best used in conjunction with this article (freely available on the Web sites of PLoS Medicine at <http://www.plosmedicine.org/>, Annals of Internal Medicine at <http://www.annals.org/>, and Epidemiology at <http://www.epidem.com/>). Information on the STROBE Initiative is available at [www.strobe-statement.org](http://www.strobe-statement.org).



**Reporting of lifetime fractures: methodological considerations and results from the Thai Cohort Study**

|                                 |                                                                                                                                                                                                                                                                                                                                                   |
|---------------------------------|---------------------------------------------------------------------------------------------------------------------------------------------------------------------------------------------------------------------------------------------------------------------------------------------------------------------------------------------------|
| Journal:                        | <i>BMJ Open</i>                                                                                                                                                                                                                                                                                                                                   |
| Manuscript ID:                  | bmjopen-2012-001000.R1                                                                                                                                                                                                                                                                                                                            |
| Article Type:                   | Research                                                                                                                                                                                                                                                                                                                                          |
| Date Submitted by the Author:   | 12-Jun-2012                                                                                                                                                                                                                                                                                                                                       |
| Complete List of Authors:       | Berecki-Gisolf, Janneke; Monash University, Monash Injury Research Institute<br>McClure, Rod; Monash University, Monash Injury Research Institute<br>Seubsman, Sam-ang; Sukhothai Thammathirat Open University, School of Human Ecology<br>Sleigh, Adrian; Australian National University, National Centre for Epidemiology and Population Health |
| <b>Primary Subject Heading</b>: | Epidemiology                                                                                                                                                                                                                                                                                                                                      |
| Secondary Subject Heading:      | Public health, Research methods                                                                                                                                                                                                                                                                                                                   |
| Keywords:                       | fracture survey, Thailand, Thai Cohort Study, incidence                                                                                                                                                                                                                                                                                           |
|                                 |                                                                                                                                                                                                                                                                                                                                                   |

SCHOLARONE™  
Manuscripts

## Reporting of lifetime fractures: methodological considerations and results from the Thai Cohort Study

Authors:

Janneke Berecki-Gisolf<sup>[1]</sup>, Rod McClure<sup>[1]</sup>, Sam-ang Seubsman<sup>[2]</sup>, Adrian Sleigh<sup>[3]</sup> and the Thai Cohort Study team

Thai Cohort Study Team:

Thailand: Jaruwan Chokhanapitak, Chaiyun Churewong, Suttanit Hounthasarn, Suwanee Khamman,

Daoruang Pandee, Suttinan Pangsap, Tippawan Prapamontol, Janya Puengson, Yodyiam Sangrattanakul, Sam-ang Seubsman, Boonchai Somboonsook, Nintita Sripaiboonkij,

Pathumvadee

Somsamai, Duangkae Vilainerun, Wanee Wimonwattanaphan. Australia: Chris Bain, Emily Banks,

Cathy Banwell, Bruce Caldwell, Gordon Carmichael, Tarie Dellora, Jane Dixon, Sharon Friel, David

Harley, Matthew Kelly, Tord Kjellstrom, Lynette Lim, Roderick McClure, Anthony McMichael, Tanya Mark, Adrian Sleigh, Lyndall Strazdins, Vasoontara Yiengprugsawan.

Affiliation and addresses of authors:

[1] Monash Injury Research Institute, Monash University, Melbourne, Australia

1  
2  
3 [2] School of Human Ecology, Sukhothai Thammathirat Open University, Nonthaburi,  
4  
5 Thailand;

6  
7  
8 [3] National Centre for Epidemiology and Population Health, Australian National University,  
9  
10 Canberra, Australia

11  
12  
13  
14  
15 Corresponding author:

16  
17 Janneke Berecki-Gisolf

18  
19 Monash Injury Research Institute,

20  
21 Building 70 Clayton Campus, Monash University

22  
23 3800 Melbourne, Australia

24  
25  
26 Tel. +61 3 99051275 Fax. +61 3 9905 4363

27  
28  
29  
30  
31 Key words: fracture incidence; fracture survey; Thailand; Thai Cohort Study

32  
33 Word count of main text: 2596

34  
35  
36  
37  
38 Funding: The Thai Cohort Study is funded by the International Collaborative Research Grants

39  
40 Scheme with joint grants from the Wellcome Trust UK (GR071587MA) and the Australian National

41  
42 Health and Medical Research Council (NHMRC) (268055), and as a global health grant from the

43  
44 NHMRC (585426).

45  
46  
47 There were no competing interests

## Structured abstract

**Objectives:** To provide estimates of fracture incidence among young adults in Thailand

**Design:** Cross-sectional analysis of a large national cohort

**Setting:** Thailand

**Participants:** 60,569 study participants residing nationwide responded to the 2009 follow up survey; 55% were women and median age was 34 years (range 19 to 92).

**Outcome measures:** Participant-reported lifetime fractures, along with age at fracture.

Fracture incidence rates per person-year were then compared using lifetime fracture reports, and again selecting only fractures reported for the last year. Incidence rates were compared by age and sex.

**Results:** 18010 lifetime fractures were reported; 11645 (65%) by men. Lifetime fracture prevalence was 30% for men and 15% for women. Lifetime incidence per 10<sup>4</sup> person years was 83; analysing only fractures from the last year yielded a corresponding incidence rate of 187. For ages 21 to 30, fractures per 10<sup>4</sup> person-years were more common among men than women (283 [95%CI 244 to 326] and 150 [130 to 173] respectively); with increasing age, rates decreased among men and increased among women (for ages 51 to 60, 97 [58 to 151] and 286 [189 to 417], respectively).

**Conclusions:** Large scale surveys provide a feasible method for establishing relative fracture incidence among informative subgroups in a population. Limiting analyses to fractures reported to have occurred recently minimises bias due to poor recall. The pattern of fracture incidence among Thais aged 20 to 60 was similar to that reported for Western countries: high falling rates in young men and high rising rates in older women.

## Article summary

### Article focus

- In developing and newly industrialised countries, epidemiological data on fractures usually cannot be derived from large administrative datasets; we have therefore developed other means to study the occurrence of fractures
- We illustrate and recommend a robust method limiting the effects of recall bias and estimating fracture incidence using direct population surveys.
- An additional aim of the study is to provide relative fracture incidence among young Thai adults using a 2009 4-year follow-up survey of a large national Thai cohort study (TCS).

### Key messages

- Limiting analyses to fractures reported to have occurred recently minimises bias due to poor recall. Survey of an educated subpopulation provided a feasible alternative for establishing relative fracture incidence.
- The relative fracture incidence among adult Thai men and women between 20 and 60 years was similar to that reported for Western countries such as the US and the UK.

### Strengths and limitations

- The strengths of the study are the very large sample size, the detailed questions on fractures, and the careful consideration of recall bias in the analysis.
- The accuracy of self-report is assisted by education.
- The gold standards concerning fractures (X-rays and medical records) were not available for our large study population.

## Introduction

Fractures are an important public health burden. Descriptive epidemiological data on the incidence and distribution of fractures in the population are relevant for the provision of health services, identifying trends and informing preventative strategies. Population fracture distributions have been described previously using administrative data, including X-ray reports,[1-4] and using survey data[5], with widely varying results. Administrative datasets of patients attending outpatient fracture clinics have the advantage of accurate fracture ascertainment, but do not capture patients admitted to hospital, patients treated in primary care or fractures that do not result in medical intervention[5]. Furthermore, to determine actual fracture incidence based on (administrative) hospital data, an estimate of the hospital catchment population is required, which is usually not feasible particularly for large surgical centres. Survey data capture all fractures regardless of medical intervention, provided there is accurate recall of the event by the study participants. Self-report of life events, however, is prone to telescoping (inaccurately reporting distant events as having occurred more recently) and fall-off (events reported in previous surveys may, in subsequent surveys, not be reported as having ever occurred)[6].

In developing countries and newly industrialised countries, large administrative datasets of routinely collected medical information may not be readily available and estimates of fracture occurrence must rely on other means. Recognising the importance of survey data in establishing fracture incidence in developing and newly industrialised countries, we present a method for quantifying and resolving the effect of poor recall on self-reported lifetime fracture incidence. In this study we also provide estimates of relative fracture incidence

1  
2  
3 among young and middle-aged adult men and women in Thailand, using the 2009 4-year  
4  
5 follow-up survey of a large national Thai cohort study (TCS).  
6  
7

## 8 **Methods**

### 9 Study population and data collection

10  
11  
12  
13  
14 The data derived from the 2009 follow-up survey of the Thai Cohort Study (TCS), which is an  
15  
16 ongoing community-based study of adult distance learning Sukhothai Thammathirat Open  
17  
18 University (STOU) students residing throughout the country. In 2005 the STOU student  
19  
20 register listed about 200,000 names and addresses: a baseline 20-page questionnaire was  
21  
22 sent to each student and 87,134 (44%) replied. The baseline characteristics of cohort  
23  
24 participants[7] and comparisons with the adult population of Thailand[8-9] have been  
25  
26 reported previously: the STOU cohort has a slightly higher proportion of females than the  
27  
28 general Thai population (54.7 vs. 50.5%); more young adults (51.5 vs. 23.9% were aged  
29  
30 between 21 and 30 years) and fewer people aged over 50 (2.0 vs. 24.7%)[8]; the age  
31  
32 distribution of the STOU cohort is shown in Figure 1. Study participants were also less likely  
33  
34 to be married and more likely to have completed junior high school; geographically the main  
35  
36 regions in Thailand are well represented in the STOU cohort[8].  
37  
38  
39  
40  
41  
42

43 Overall the cohort represents well the geo-demographic, ethnic, occupational and  
44  
45 socioeconomic status of the young-adult Thai population. This is because most Open  
46  
47 University students are unable to leave their locations to attend an on-campus university  
48  
49 fulltime: most already have established jobs and family responsibilities, and are of modest  
50  
51 economic circumstances. However, they are better educated than the general Thai  
52  
53 population and thus are able to respond to complex health questionnaires. In 2009, a  
54  
55 follow-up survey was sent and 60,569 (>70%) participants replied: 55% were women and  
56  
57  
58  
59  
60



1  
2  
3 the median age was 34 years (range 19 to 92). Data scanning, verifying, and correcting were  
4  
5 conducted using Scandevet, a program developed by a research team from Khon Kaen  
6  
7 University. Further data editing was completed using SQL and SPSS software.  
8  
9

#### 10 Ethical considerations

11  
12  
13  
14 Ethics approval was obtained from Sukhothai Thammathirat Open University Research and  
15  
16 Development Institute (protocol 0522/10) and the Australian National University Human  
17  
18 Research Ethics Committee (protocols 2004344 and 2009570). Informed written consent  
19  
20 was obtained from all participants.  
21  
22

#### 23 Measures

24  
25  
26  
27 The core question asked was “In your life have you ever experienced a fracture to the areas  
28  
29 of your body mentioned below? If so please place a cross in the Yes box and indicate the age  
30  
31 at which the fracture occurred” followed by a list: Finger/toe; wrist; arm; collarbone; rib;  
32  
33 skull; face/jaw/nose; neck; back; pelvis; leg; ankle; other. Skull fractures may have been  
34  
35 over-reported (by being confused with skull trauma due to the wording used in the original  
36  
37 Thai questionnaire) and as this is the subject of further investigation skull fractures are not  
38  
39 included in this report. Other variables included in this analysis are age and gender.  
40  
41  
42

43  
44 Participant age was divided into bands of 10 years (21-30, 31-40, 41-50, 51-60 and 61-70).  
45  
46 Age-category analyses presented here excluded 7 cohort members aged less than 21 years  
47  
48 as they were too few in number to reliably represent that age group. Generally, age groups  
49  
50 with very small numbers of people in them were not presented in the age-specific results to  
51  
52 prevent distorting age effects. .  
53  
54

#### 55 Analysis

1  
2  
3 Only fractures that were reported together with an age at the time of fracture were  
4  
5 included in the analysis. Lifetime prevalence of fractures was calculated as the percentage  
6  
7 of participants who reported ever having had a fracture. Lifetime incidence of fractures per  
8  
9 100,000 person-years was calculated by dividing the number of reported fractures by the  
10  
11 sum of the ages of all study participants, and multiplying by 100,000. Fracture incidence was  
12  
13 also calculated using a range of recall periods: for example, for a recall period of 10 years,  
14  
15 only fractures that were reported to have occurred within the last 10 years were included in  
16  
17 the incidence calculation, and the denominator was the number of study participants  
18  
19 multiplied by 10 (to account for 10 years of recall). Confidence intervals for the incidence  
20  
21 rates were calculated by first assuming fracture occurrence to have a Poisson distribution,  
22  
23 and finding its related confidence interval[10]. Differences in recall for leg vs. finger/toe  
24  
25 fractures were calculated using a Z-test for two proportions: the reported number of  
26  
27 fractures over 10 years divided by the expected number of fractures based on 1-year recall  
28  
29 multiplied by 10. All analyses were conducted using SAS software, version 9.2.  
30  
31  
32  
33  
34  
35  
36

## 37 Results

38  
39 The 60569 Thai Cohort Study participants who responded to the 2009 survey reported a  
40  
41 total of 18280 lifetime fractures; age at the time of fractures was included for 18010 (99%)  
42  
43 of these. The overall lifetime prevalence of ever having sustained any fracture was 22%:  
44  
45 there were 47445 (78%) participants who did not report any fracture; 9964 (16%) who  
46  
47 reported a fracture at one site; 2146 (4%) who reported a fracture at two sites and 1014  
48  
49 (2%) who reported fractures at three or more sites. The distribution of the age-at-fracture  
50  
51 as well as the overall study participant age distribution is shown in Figure 1. Among  
52  
53  
54  
55  
56 participants below the age of 40, women are in the majority; above 40 years men are in the  
57  
58  
59  
60

majority. Although there are more women than men in the study, 65% (11645/18010) of all fractures were reported by men. There was over-reporting of fractures at rounded ages such as 25, 30, 35 and 40 as well as 18 years (Figure 1, bottom); a more natural distribution can be achieved by using a 5-year interval scale.

Table 1. Lifetime prevalence of fractures in Thai cohort members by age and sex.

| Age group    | Lifetime prevalence of fractures       |                |                                        |                |
|--------------|----------------------------------------|----------------|----------------------------------------|----------------|
|              | Men                                    |                | Women                                  |                |
|              | Ever had a fracture / number of people | Prevalence (%) | Ever had a fracture / number of people | Prevalence (%) |
| 21-30        | 1833 / 6688                            | 27             | 1743 / 13003                           | 13             |
| 31-40        | 3527 / 11519                           | 31             | 2038 / 13174                           | 15             |
| 41-50        | 2128 / 6883                            | 31             | 948 / 5956                             | 16             |
| 51-60        | 588 / 1965                             | 30             | 197 / 943                              | 21             |
| 61-70        | 89 / 300                               | 30             | 18 / 74                                | 24             |
| <i>Total</i> | <i>8165 / 27355</i>                    | <i>30</i>      | <i>4944 / 33150</i>                    | <i>15</i>      |

The prevalence of fractures among men in their 20s and 30s was twice as high as that of women of the same age group (Table 1). Having sustained a fracture was more common among women in their 50s and 60s than among younger women; among men, there was no marked difference between the age groups.

Table 2. Fracture incidence calculated from lifetime fractures and from fractures reported for the last year only

| Fracture site | Lifetime fractures  |                   | Fractures in the last year |                   |
|---------------|---------------------|-------------------|----------------------------|-------------------|
|               | Number of fractures | Crude incidence * | Number of fractures        | Crude incidence † |
| Finger/toe    | 3519                | 163               | 268                        | 442               |
| Wrist         | 1995                | 92                | 98                         | 162               |
| Arm           | 2967                | 137               | 76                         | 125               |
| Collarbone    | 1571                | 73                | 62                         | 102               |
| Rib           | 514                 | 24                | 53                         | 88                |
| Face/Jaw/Nose | 1006                | 47                | 47                         | 78                |
| Neck          | 213                 | 10                | 21                         | 35                |
| Back          | 610                 | 28                | 73                         | 121               |
| Pelvis        | 270                 | 13                | 19                         | 31                |
| Leg           | 2007                | 93                | 108                        | 178               |
| Ankle         | 2051                | 95                | 171                        | 282               |
| Other         | 1287                | 60                | 134                        | 221               |
| <i>Total</i>  | <i>18010</i>        | <i>834</i>        | <i>1130</i>                | <i>1866</i>       |

\* Calculated over 2159580 person years. † Calculated over 60569 person years.

Note: Fracture incidence expressed per 100,000 person-years. The lifetime fracture crude incidence includes childhood fractures; the fractures in the last year do not (as the youngest study participant is 19 years).

The fracture incidence per 100,000 person years by fractures site is given in Table 2.

Finger/toe, arm and ankle fractures were the most common; pelvis and neck fractures the least common. Counting only fractures that occurred in the year prior to the survey resulted in a much higher fracture incidence for most fracture sites. Lifetime fracture incidence includes childhood fractures and relies on accurate recall over a lifetime; fractures over the last year, on the other hand, are derived from recent events, and because the youngest participants were 19 years, childhood fractures are not included.

1  
2  
3 This is further illustrated in Figure 2: calculating fracture incidence over a longer recall  
4  
5 period resulted in a lower fracture incidence; this effect is seen both in men and women,  
6  
7 and across all age groups. The decline in incidence when calculated over longer recall  
8  
9 periods is greater for less memorable fractures such as finger/toe, than for fractures  
10  
11 associated with greater inconvenience such as leg fractures. Based on the number of  
12  
13 fractures reported to have occurred in the last year, we can calculate the expected number  
14  
15 for a 10-year period of recall and then compare this to the actual reported number. For  
16  
17 finger/toe fractures, the reported number was 55% (95% CI 54 to 57) of the expected, and  
18  
19 for leg fractures the corresponding number was 65% (95%CI 62 to 67). Assuming steady  
20  
21 fracture rates over time, the 10-year recall was statistically significantly lower for finger/toe  
22  
23 than for leg fractures.  
24  
25  
26  
27  
28

29  
30 Because the fracture incidence declined when calculated over increasing length of recall, for  
31  
32 further analyses only fractures reported to have occurred in the last year were used.  
33

34 Fracture incidence per age group for men and women is shown in Figure 3: fractures were  
35  
36 more common among young men than among young women; with increasing age, among  
37  
38 men the fracture incidence decreased whereas among women fracture incidence increased.  
39  
40 Among women above 50 years, fracture incidence was higher than that among men of  
41  
42 above 50 years.  
43  
44  
45  
46  
47  
48  
49  
50  
51  
52  
53  
54  
55  
56  
57  
58  
59  
60

## Discussion

This study reports the fracture incidence among Thais aged between 20 and 60 years.

Fractures are common, particularly among men under 40 and women above 50 years.

The results of the present study indicate a progressive decline in recall-based fracture incidence over an increasing number of years. Although this pattern appears to be general across age and gender, the magnitude of 'recall inaccuracy' also depends on the severity of the event, with leg fractures being recalled much more accurately than finger/toe fractures. These results, however, should be interpreted with caution as the decline in incidence with increasing recall period could in part be explained by a real increase in fracture incidence over time. Thailand is transitioning to a modern consumer economy[9] which could be leading to an increase in fractures due to traffic injury. Baseline frequencies of transport[11] and other injuries[12] from the 2005 survey of the Thai Cohort Study have been reported; a change in injury incidence and fracture incidence over time is a topic for further study. Regardless of the underlying change over time, using only the last year of recall to calculate incidence is the most accurate and timely representation of fracture incidence; furthermore, it facilitates comparisons with other studies reporting 12-months recall of fractures.

The overall fracture incidence recorded in the present study is by and large comparable to previous studies that were based on medical records and X-ray reports: some studies reported lower incidence[1, 13-15] and others reported similar rates[3-4, 16]. A recent UK study using a self-report survey reported a fracture incidence twice as high as that presented in this Thai study[5]: whether this reflects higher fracture rates or better recall in the UK remains to be investigated.

1  
2  
3 The increase in the incidence of fractures between the ages of 20 and 60 among women and  
4  
5 the simultaneous decrease among men seen in this Thai study have been reported  
6  
7 previously in studies from the UK[1, 4-5], US[2], and Norway[3]. Men in their 20s have  
8  
9 previously been reported to have a much higher incidence of fractures than women: this  
10  
11 gender difference gradually disappears with age[1-5, 14], as also seen in the present Thai  
12  
13 study.  
14  
15

16  
17  
18 The pattern of fracture incidence among adult Thais presented here differs from reports  
19  
20 from Western studies in two ways. First, the age of onset of a steep increase in fracture  
21  
22 rates among women is manifest among the 51-60 year old Thais, but in reports from  
23  
24 Western countries[4, 13, 16] a steep increase is not apparent until after the age of 65-70  
25  
26 years. This steep increase among older women generally reflects osteoporosis: the present  
27  
28 results could therefore indicate earlier onset of osteoporosis among Thai women. This is in  
29  
30 agreement with a 2001 study of age-specific osteoporosis prevalence among Thai women  
31  
32 which showed that prevalence increased steeply between the ages of 50 and 59 years[17].  
33  
34 The second discrepancy is the observed decrease in fractures between the ages of 40 and 60  
35  
36 among Thai men. Possibly the decrease in fracture rates after age 20-25 seen among  
37  
38 Western men[3, 14] is not manifest among Thai men until much later because of continued  
39  
40 high-risk physical labour; the decrease in fractures after the age of 40 in Thai men could  
41  
42 reflect a transitioning out of high-risk work around that age.  
43  
44  
45  
46  
47  
48

49 This study has several limitations. The study sample did not include sufficient representation  
50  
51 of all age groups to allow for population based age-standardised incidence calculations.  
52  
53 Because fracture incidence is generally described as two-peaked, with greatest incidence in  
54  
55 the young and the elderly[1-3, 5], the fracture incidence presented in this study is an under-  
56  
57  
58  
59  
60

1  
2  
3 estimate of that of the general Thai population, as the young (<20) are not represented and  
4  
5 the elderly (61+, n=431) are under-represented. The findings of this study are therefore  
6  
7 limited to Thais between the ages of 20 and 60.  
8  
9

10  
11 The accuracy of self-report studies is by definition limited by the accuracy of participant  
12  
13 reporting. A comparison of self-report with X-ray reports (the gold standard) was not  
14  
15 feasible. Instead, we have attempted to quantify self-report (in-) accuracy in two other  
16  
17 ways: first, by showing over-reporting of fractures at rounded ages (Fig. 1). This  
18  
19 phenomenon distorts the time distribution rather than the overall number of reported  
20  
21 events. The second self-report inaccuracy we have quantified is fall-off over time. Recent  
22  
23 events were recalled more accurately than events that occurred longer ago.  
24  
25  
26  
27

## 28 **Conclusions**

29  
30 Self-report surveys provide a feasible alternative to hospital-records and X-ray records  
31  
32 research for establishing fracture incidence; however, when lifetime fractures are reported,  
33  
34 using only fractures reported to have occurred in the last year minimises bias due to poor  
35  
36 recall. The results of this study indicate that the pattern of fracture incidence among adult  
37  
38 Thai Cohort Study participants between 20 and 60 years is similar to that reported for  
39  
40 Western countries such as the US and the UK. Overall, we see fracture in Thailand is a larger  
41  
42 burden for younger men and older women but we need more background information  
43  
44 before we can understand better the environmental and personal factors that account for  
45  
46 this age and sex pattern of occurrence. Such analyses will be the focus of future reports  
47  
48 from the Thai Cohort Study.  
49  
50  
51  
52  
53

## 54 **Competing Interests**

55  
56 The authors declare that they have no competing interests.  
57  
58  
59  
60



### Authors' contributions

JG and RM analysed the data and conceptualized and drafted the manuscript. SS and AS designed and instituted the Thai Health-Risk Transition research project and helped the data analysis and interpretation for this report. All authors read and approved the final manuscript.

### Funding

This work was supported by the International Collaborative Research Grants Scheme with joint grants from the Wellcome Trust UK (GR071587MA) and the Australian National Health and Medical Research Council (NHMRC)(268055), and as a global health grant from the NHMRC (585426). We thank the staff at Sukhothai Thammathirat Open University (STOU) who assisted with student contact and the STOU students who are participating in the cohort study. We also thank Dr Bandit Thinkamrop and his team from Khon Kaen University for guiding us successfully through the complex data processing.

### References

1. Donaldson LJ, Cook A, Thomson RG. Incidence of fractures in a geographically defined population. *J Epidemiol Community Health* 1990;44:241-5.
2. Fife D, Barancik JI. Northeastern Ohio Trauma Study III: incidence of fractures. *Ann Emerg Med* 1985;14:244-8.
3. Sahlin Y. Occurrence of fractures in a defined population: a 1-year study. *Injury* 1990;21:158-60.
4. Johansen A, Evans RJ, Stone MD, et al. Fracture incidence in England and Wales: a study based on the population of Cardiff. *Injury* 1997;28:655-60.

- 1  
2  
3 5. Donaldson LJ, Reckless IP, Scholes S, Mindell JS, Shelton NJ. The epidemiology of fractures in  
4  
5  
6  
7  
8  
9  
10  
11  
12  
13  
14  
15  
16  
17  
18  
19  
20  
21  
22  
23  
24  
25  
26  
27  
28  
29  
30  
31  
32  
33  
34  
35  
36  
37  
38  
39  
40  
41  
42  
43  
44  
45  
46  
47  
48  
49  
50  
51  
52  
53  
54  
55  
56  
57  
58  
59  
60  
England. *J Epidemiol Community Health* 2008;62:174-80.
6. Pachana NA, Brilleman SL, Dobson AJ. Reporting of life events over time: Methodological issues in a longitudinal sample of women. *Psychol Assess* 2011;23:277-81.
7. Seubsman SA, Lim LL, Banwell C, et al. Socioeconomic status, sex, and obesity in a large national cohort of 15-87-year-old open university students in Thailand. *J Epidemiol* 2010;20:13-20.
8. Seubsman SA, Yiengprugsawan V, Sleigh A. A large national Thai Cohort Study of the Health-Risk Transition based on Sukhothai Thammathirat Open University students. *ASEAN Journal of Open Distance Learning* 2010.
9. Sleigh AC, Seubsman SA, Bain C. Cohort profile: The Thai Cohort of 87,134 Open University students. *Int J Epidemiol* 2008;37:266-72.
10. Altman DGM, D.; Bryant, T.N.; Gardner, M.J., editor. *Statistics with confidence*. 2nd ed. Bristol: BMJ Books; 2000.
11. Stephan K, Kelly M, McClure R, et al. Distribution of transport injury and related risk behaviours in a large national cohort of Thai adults. *Accid Anal Prev* 2011;43:1062-7.
12. Stephan K, McClure R, Seubsman SA, et al. Review of injuries over a one year period among 87,134 adults studying at an open university in Thailand. *Southeast Asian J Trop Med Public Health* 2010;41:1220-30.
13. Cooley H, Jones G. A population-based study of fracture incidence in southern Tasmania: lifetime fracture risk and evidence for geographic variations within the same country. *Osteoporos Int* 2001;12:124-30.
14. Jones G, Cooley HM. Symptomatic fracture incidence in those under 50 years of age in southern Tasmania. *J Paediatr Child Health* 2002;38:278-83.

- 1  
2  
3 15. Sanders KM, Seeman E, Ugoni AM, et al. Age- and gender-specific rate of fractures in  
4  
5 Australia: a population-based study. *Osteoporos Int* 1999;10:240-7.  
6  
7  
8 16. Melton LJ, 3rd, Crowson CS, O'Fallon WM. Fracture incidence in Olmsted County, Minnesota:  
9  
10 comparison of urban with rural rates and changes in urban rates over time. *Osteoporos Int*  
11  
12 1999;9:29-37.  
13  
14  
15 17. Limpaphayom KK, Taechakraichana N, Jaisamrarn U, et al. Prevalence of osteopenia and  
16  
17 osteoporosis in Thai women. *Menopause* 2001;8:65-9.  
18  
19  
20  
21  
22  
23  
24  
25  
26  
27  
28  
29  
30  
31  
32  
33  
34  
35  
36  
37  
38  
39  
40  
41  
42  
43  
44  
45  
46  
47  
48  
49  
50  
51  
52  
53  
54  
55  
56  
57  
58  
59  
60

1  
2  
3 Figure Legends  
4  
5  
6  
7

8 **Figure 1. Top: Histogram of Thai Cohort Study participant age. Bottom: Histogram of the**  
9 **total lifetime fractures reported by Thai Cohort Study participants: over-reporting of**  
10 **fractures can be seen at ages such as 10, 15, 18, 25, 30, 35 and 40**

11  
12  
13  
14  
15  
16  
17  
18 Figure 2. Fracture incidence calculated using a recall period of 1 through to 10 years. Results  
19 are shown for fractures that were reported to occur between the ages 20 to 30, 30 to 40  
20 and 40 to 50.  
21  
22  
23

24  
25  
26  
27 Figure 3. Overall fracture incidence for men and women for a recall period of one year. Error  
28 bars represent 95% confidence intervals.  
29  
30  
31  
32

### 33 34 35 36 37 **Authors' contributions**

38 JG and RM analysed the data and conceptualized and drafted the manuscript. SS and AS designed  
39 and instituted the Thai Health-Risk Transition research project and helped the data analysis and  
40 interpretation for this report. All authors read and approved the final manuscript.  
41  
42  
43  
44  
45  
46  
47  
48  
49  
50  
51  
52  
53  
54  
55  
56  
57  
58  
59  
60

1  
2  
3  
4  
5  
6  
7  
8  
9  
10  
11  
12  
13  
14  
15  
16  
17  
18  
19  
20  
21  
22  
23  
24  
25  
26  
27  
28  
29  
30  
31  
32  
33  
34  
35  
36  
37  
38  
39  
40  
41  
42  
43  
44  
45  
46  
47  
48  
49  
50  
51  
52  
53  
54  
55  
56  
57  
58  
59  
60

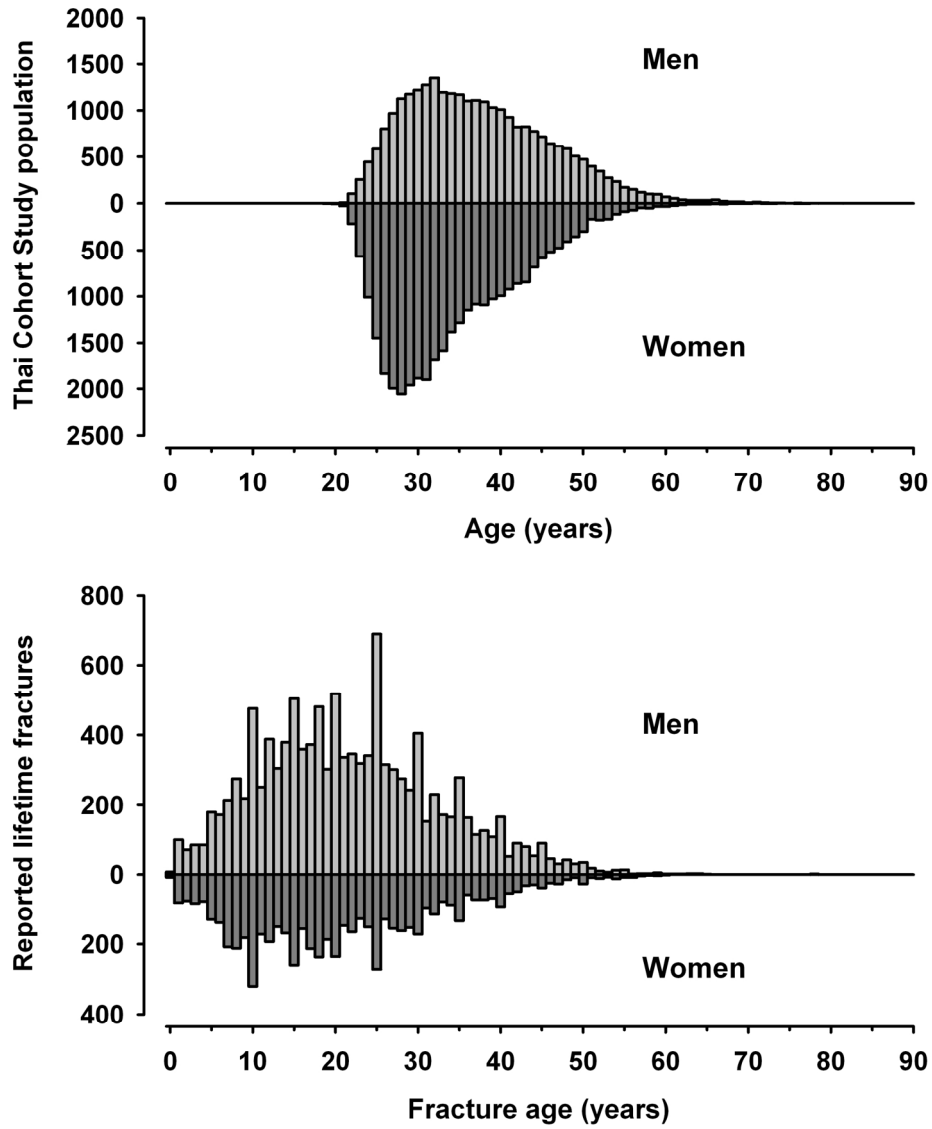

Figure 1. Top: Histogram of Thai Cohort Study participant age. Bottom: Histogram of the total lifetime fractures reported by Thai Cohort Study participants: over-reporting of fractures can be seen at ages such as 10, 15, 18, 25, 30, 35 and 40  
176x222mm (300 x 300 DPI)

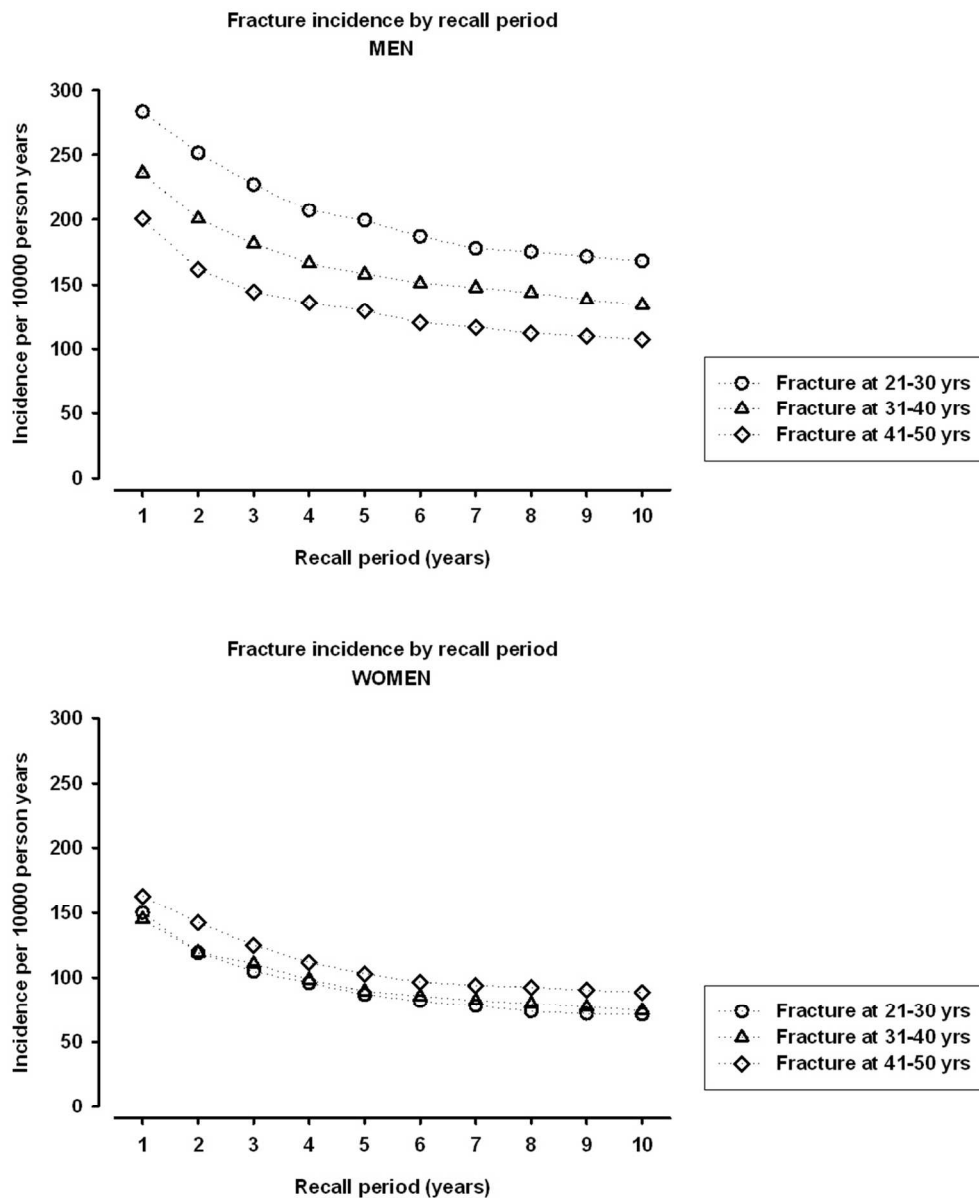

Figure 2. Fracture incidence calculated using a recall period of 1 through to 10 years. Results are shown for fractures that were reported to occur between the ages 20 to 30, 30 to 40 and 40 to 50.  
173x210mm (150 x 150 DPI)

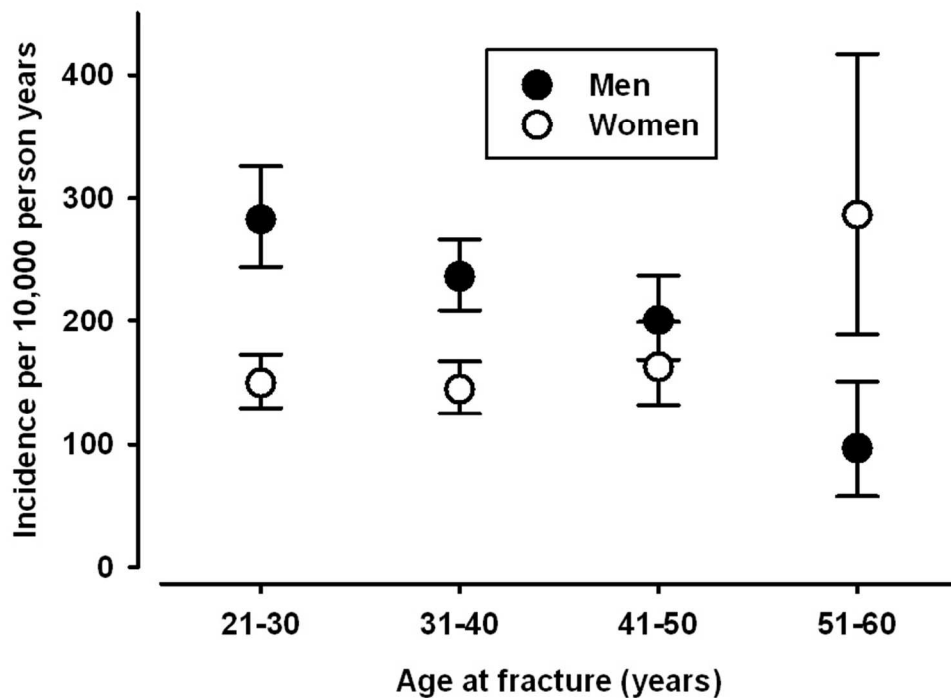

Figure 3. Overall fracture incidence for men and women for a recall period of one year. Error bars represent 95% confidence intervals.

160x124mm (150 x 150 DPI)

**STROBE 2007 (v4) checklist of items to be included in reports of observational studies in epidemiology\***  
**Checklist for cohort, case-control, and cross-sectional studies (combined)**

| Section/Topic             | Item # | Recommendation                                                                                                                                                                                                                                                                                                                                                                                                                                                         | Reported on page # |
|---------------------------|--------|------------------------------------------------------------------------------------------------------------------------------------------------------------------------------------------------------------------------------------------------------------------------------------------------------------------------------------------------------------------------------------------------------------------------------------------------------------------------|--------------------|
| Title and abstract        | 1      | (a) Indicate the study's design with a commonly used term in the title or the abstract                                                                                                                                                                                                                                                                                                                                                                                 | 5                  |
|                           |        | (b) Provide in the abstract an informative and balanced summary of what was done and what was found                                                                                                                                                                                                                                                                                                                                                                    | 5                  |
| <b>Introduction</b>       |        |                                                                                                                                                                                                                                                                                                                                                                                                                                                                        |                    |
| Background/rationale      | 2      | Explain the scientific background and rationale for the investigation being reported                                                                                                                                                                                                                                                                                                                                                                                   | 6                  |
| Objectives                | 3      | State specific objectives, including any pre-specified hypotheses                                                                                                                                                                                                                                                                                                                                                                                                      | 6                  |
| <b>Methods</b>            |        |                                                                                                                                                                                                                                                                                                                                                                                                                                                                        |                    |
| Study design              | 4      | Present key elements of study design early in the paper                                                                                                                                                                                                                                                                                                                                                                                                                | 8                  |
| Setting                   | 5      | Describe the setting, locations, and relevant dates, including periods of recruitment, exposure, follow-up, and data collection                                                                                                                                                                                                                                                                                                                                        | 8                  |
| Participants              | 6      | (a) <i>Cohort study</i> —Give the eligibility criteria, and the sources and methods of selection of participants. Describe methods of follow-up<br><i>Case-control study</i> —Give the eligibility criteria, and the sources and methods of case ascertainment and control selection. Give the rationale for the choice of cases and controls<br><i>Cross-sectional study</i> —Give the eligibility criteria, and the sources and methods of selection of participants | 7                  |
|                           |        | (b) <i>Cohort study</i> —For matched studies, give matching criteria and number of exposed and unexposed<br><i>Case-control study</i> —For matched studies, give matching criteria and the number of controls per case                                                                                                                                                                                                                                                 |                    |
| Variables                 | 7      | Clearly define all outcomes, exposures, predictors, potential confounders, and effect modifiers. Give diagnostic criteria, if applicable                                                                                                                                                                                                                                                                                                                               | 8-9                |
| Data sources/ measurement | 8*     | For each variable of interest, give sources of data and details of methods of assessment (measurement). Describe comparability of assessment methods if there is more than one group                                                                                                                                                                                                                                                                                   | 8-9                |
| Bias                      | 9      | Describe any efforts to address potential sources of bias                                                                                                                                                                                                                                                                                                                                                                                                              | 9                  |
| Study size                | 10     | Explain how the study size was arrived at                                                                                                                                                                                                                                                                                                                                                                                                                              | 7                  |
| Quantitative variables    | 11     | Explain how quantitative variables were handled in the analyses. If applicable, describe which groupings were chosen and why                                                                                                                                                                                                                                                                                                                                           | 7-9                |
| Statistical methods       | 12     | (a) Describe all statistical methods, including those used to control for confounding                                                                                                                                                                                                                                                                                                                                                                                  | 9                  |
|                           |        | (b) Describe any methods used to examine subgroups and interactions                                                                                                                                                                                                                                                                                                                                                                                                    | 9                  |
|                           |        | (c) Explain how missing data were addressed                                                                                                                                                                                                                                                                                                                                                                                                                            | 9                  |
|                           |        | (d) <i>Cohort study</i> —If applicable, explain how loss to follow-up was addressed<br><i>Case-control study</i> —If applicable, explain how matching of cases and controls was addressed                                                                                                                                                                                                                                                                              | n/a                |



|                          |     |                                                                                                                                                                                                              |       |
|--------------------------|-----|--------------------------------------------------------------------------------------------------------------------------------------------------------------------------------------------------------------|-------|
|                          |     | <i>Cross-sectional study</i> —If applicable, describe analytical methods taking account of sampling strategy                                                                                                 |       |
|                          |     | (e) Describe any sensitivity analyses                                                                                                                                                                        | 9     |
| <b>Results</b>           |     |                                                                                                                                                                                                              |       |
| Participants             | 13* | (a) Report numbers of individuals at each stage of study—eg numbers potentially eligible, examined for eligibility, confirmed eligible, included in the study, completing follow-up, and analysed            | 9-10  |
|                          |     | (b) Give reasons for non-participation at each stage                                                                                                                                                         | n/a   |
|                          |     | (c) Consider use of a flow diagram                                                                                                                                                                           | -     |
| Descriptive data         | 14* | (a) Give characteristics of study participants (eg demographic, clinical, social) and information on exposures and potential confounders                                                                     | 9-10  |
|                          |     | (b) Indicate number of participants with missing data for each variable of interest                                                                                                                          | 9     |
|                          |     | (c) <i>Cohort study</i> —Summarise follow-up time (eg, average and total amount)                                                                                                                             | -     |
| Outcome data             | 15* | <i>Cohort study</i> —Report numbers of outcome events or summary measures over time                                                                                                                          | -     |
|                          |     | <i>Case-control study</i> —Report numbers in each exposure category, or summary measures of exposure                                                                                                         |       |
|                          |     | <i>Cross-sectional study</i> —Report numbers of outcome events or summary measures                                                                                                                           | 9-10  |
| Main results             | 16  | (a) Give unadjusted estimates and, if applicable, confounder-adjusted estimates and their precision (eg, 95% confidence interval). Make clear which confounders were adjusted for and why they were included |       |
|                          |     | (b) Report category boundaries when continuous variables were categorized                                                                                                                                    | 9-11  |
|                          |     | (c) If relevant, consider translating estimates of relative risk into absolute risk for a meaningful time period                                                                                             |       |
| Other analyses           | 17  | Report other analyses done—eg analyses of subgroups and interactions, and sensitivity analyses                                                                                                               | 9-11  |
| <b>Discussion</b>        |     |                                                                                                                                                                                                              |       |
| Key results              | 18  | Summarise key results with reference to study objectives                                                                                                                                                     | 10    |
| Limitations              | 19  | Discuss limitations of the study, taking into account sources of potential bias or imprecision. Discuss both direction and magnitude of any potential bias                                                   | 13-14 |
| Interpretation           | 20  | Give a cautious overall interpretation of results considering objectives, limitations, multiplicity of analyses, results from similar studies, and other relevant evidence                                   | 15    |
| Generalisability         | 21  | Discuss the generalisability (external validity) of the study results                                                                                                                                        | 14    |
| <b>Other information</b> |     |                                                                                                                                                                                                              |       |
| Funding                  | 22  | Give the source of funding and the role of the funders for the present study and, if applicable, for the original study on which the present article is based                                                | 15-16 |

\*Give information separately for cases and controls in case-control studies and, if applicable, for exposed and unexposed groups in cohort and cross-sectional studies.

**Note:** An Explanation and Elaboration article discusses each checklist item and gives methodological background and published examples of transparent reporting. The STROBE checklist is best used in conjunction with this article (freely available on the Web sites of PLoS Medicine at <http://www.plosmedicine.org/>, Annals of Internal Medicine at <http://www.annals.org/>, and Epidemiology at <http://www.epidem.com/>). Information on the STROBE Initiative is available at [www.strobe-statement.org](http://www.strobe-statement.org).



**Reporting of lifetime fractures: methodological considerations and results from the Thai Cohort Study**

|                                 |                                                                                                                                                                                                                                                                                                                                                   |
|---------------------------------|---------------------------------------------------------------------------------------------------------------------------------------------------------------------------------------------------------------------------------------------------------------------------------------------------------------------------------------------------|
| Journal:                        | <i>BMJ Open</i>                                                                                                                                                                                                                                                                                                                                   |
| Manuscript ID:                  | bmjopen-2012-001000.R2                                                                                                                                                                                                                                                                                                                            |
| Article Type:                   | Research                                                                                                                                                                                                                                                                                                                                          |
| Date Submitted by the Author:   | 23-Jul-2012                                                                                                                                                                                                                                                                                                                                       |
| Complete List of Authors:       | Berecki-Gisolf, Janneke; Monash University, Monash Injury Research Institute<br>McClure, Rod; Monash University, Monash Injury Research Institute<br>Seubsman, Sam-ang; Sukhothai Thammathirat Open University, School of Human Ecology<br>Sleigh, Adrian; Australian National University, National Centre for Epidemiology and Population Health |
| <b>Primary Subject Heading</b>: | Epidemiology                                                                                                                                                                                                                                                                                                                                      |
| Secondary Subject Heading:      | Public health, Research methods                                                                                                                                                                                                                                                                                                                   |
| Keywords:                       | fracture survey, Thailand, Thai Cohort Study, incidence                                                                                                                                                                                                                                                                                           |
|                                 |                                                                                                                                                                                                                                                                                                                                                   |

SCHOLARONE™  
Manuscripts

## Reporting of lifetime fractures: methodological considerations and results from the Thai Cohort Study

Authors:

Janneke Berecki-Gisolf<sup>[1]</sup>, Rod McClure<sup>[1]</sup>, Sam-ang Seubsman<sup>[2]</sup>, Adrian Sleight<sup>[3]</sup> and the Thai Cohort Study team

Thai Cohort Study Team:

Thailand: Jaruwan Chokhanapitak, Chaiyun Churewong, Suttanit Hounthasarn, Suwanee Khamman,

Daoruang Pandee, Suttinan Pangsap, Tippawan Prapamontol, Janya Puengson, Yodyiam Sangrattanakul, Sam-ang Seubsman, Boonchai Somboonsook, Nintita Sripaiboonkij, Pathumvadee

Somsamai, Duangkae Vilainerun, Wanee Wimonwattanaphan. Australia: Chris Bain, Emily Banks,

Cathy Banwell, Bruce Caldwell, Gordon Carmichael, Tarie Dellora, Jane Dixon, Sharon Friel, David

Harley, Matthew Kelly, Tord Kjellstrom, Lynette Lim, Roderick McClure, Anthony McMichael, Tanya Mark, Adrian Sleight, Lyndall Strazdins, Vasoontara Yiengprugsawan.

Affiliation and addresses of authors:

[1] Monash Injury Research Institute, Monash University, Melbourne, Australia

1  
2  
3 [2] School of Human Ecology, Sukhothai Thammathirat Open University, Nonthaburi,  
4  
5 Thailand;

6  
7  
8 [3] National Centre for Epidemiology and Population Health, Australian National University,  
9  
10 Canberra, Australia

11  
12  
13  
14  
15 Corresponding author:

16  
17 Janneke Berecki-Gisolf

18  
19 Monash Injury Research Institute,

20  
21 Building 70 Clayton Campus, Monash University

22  
23 3800 Melbourne, Australia

24  
25  
26 Tel. +61 3 99051275 Fax. +61 3 9905 4363

27  
28  
29  
30  
31 Key words: fracture incidence; fracture survey; Thailand; Thai Cohort Study

32  
33 Word count of main text: 2596

34  
35  
36  
37  
38 Funding: The Thai Cohort Study is funded by the International Collaborative Research Grants

39  
40 Scheme with joint grants from the Wellcome Trust UK (GR071587MA) and the Australian National

41  
42 Health and Medical Research Council (NHMRC) (268055), and as a global health grant from the

43  
44 NHMRC (585426).

45  
46  
47 There were no competing interests

## Structured abstract

**Objectives:** To provide estimates of fracture incidence among young adults in Thailand

**Design:** Cross-sectional analysis of a large national cohort

**Setting:** Thailand

**Participants:** 60,569 study participants residing nationwide responded to the 2009 follow up survey; 55% were women and median age was 34 years (range 19 to 92).

**Outcome measures:** Self-reported lifetime fractures, along with age at fracture. Fracture incidence rates per person-year were then compared using lifetime fracture reports, and again selecting only fractures reported for the last year. Incidence rates were compared by age and sex.

**Results:** 18010 lifetime fractures were reported; 11645 (65%) by men. Lifetime fracture prevalence was 30% for men and 15% for women. Lifetime incidence per 10<sup>4</sup> person years was 83; analysing only fractures from the last year yielded a corresponding incidence rate of 187. For ages 21 to 30, fractures per 10<sup>4</sup> person-years were more common among men than women (283 [95%CI 244 to 326] and 150 [130 to 173] respectively); with increasing age, rates decreased among men and increased among women (for ages 51 to 60, 97 [58 to 151] and 286 [189 to 417], respectively).

**Conclusions:** Large scale surveys provide a feasible method for establishing relative fracture incidence among informative subgroups in a population. Limiting analyses to fractures reported to have occurred recently minimises bias due to poor recall. The pattern of self-reported fracture incidence among Thais aged 20 to 60 was similar to that reported for Western countries: high falling rates in young men and high rising rates in older women.

## Article summary

### Article focus

- In developing and newly industrialised countries, epidemiological data on fractures usually cannot be derived from large administrative datasets; we have therefore developed other means to study the occurrence of fractures
- We illustrate and recommend a robust method limiting the effects of recall bias and estimating fracture incidence using direct population surveys.
- An additional aim of the study is to provide relative fracture incidence among young Thai adults using a 2009 4-year follow-up survey of a large national Thai cohort study (TCS).

### Key messages

- Limiting analyses to fractures reported to have occurred recently minimises bias due to poor recall. Survey of an educated subpopulation provided a feasible alternative for establishing relative fracture incidence.
- The relative **self-reported** fracture incidence among adult Thai men and women between 20 and 60 years was similar to that reported for Western countries such as the US and the UK.

### Strengths and limitations

- The strengths of the study are the very large sample size, the detailed questions on fractures, and the careful consideration of recall bias in the analysis.
- The accuracy of self-report is assisted by education.
- The gold standards concerning fractures (X-rays and medical records) were not available for our large study population.

## Introduction

Fractures are an important public health burden. Descriptive epidemiological data on the incidence and distribution of fractures in the population are relevant for the provision of health services, identifying trends and informing preventative strategies. Population fracture distributions have been described previously using administrative data, including X-ray reports,[1-4] and using survey data[5], with widely varying results. Administrative datasets of patients attending outpatient fracture clinics have the advantage of accurate fracture ascertainment, but do not capture patients admitted to hospital, patients treated in primary care or fractures that do not result in medical intervention[5]. Furthermore, to determine actual fracture incidence based on (administrative) hospital data, an estimate of the hospital catchment population is required, which is usually not feasible particularly for large surgical centres. Survey data capture all fractures regardless of medical intervention, provided there is accurate recall of the event by the study participants. Self-report of life events, however, is prone to telescoping (inaccurately reporting distant events as having occurred more recently) and fall-off (events reported in previous surveys may, in subsequent surveys, not be reported as having ever occurred)[6].

In developing countries and newly industrialised countries, large administrative datasets of routinely collected medical information may not be readily available and estimates of fracture occurrence must rely on other means. Recognising the importance of survey data in establishing fracture incidence in developing and newly industrialised countries, we present a method for quantifying and resolving the effect of poor recall on self-reported lifetime fracture incidence. In this study we also provide estimates of relative fracture incidence

1  
2  
3 among young and middle-aged adult men and women in Thailand, using the 2009 4-year  
4  
5 follow-up survey of a large national Thai cohort study (TCS).  
6  
7

## 8 **Methods**

### 9 Study population and data collection

10  
11  
12  
13  
14 The data derived from the 2009 follow-up survey of the Thai Cohort Study (TCS), which is an  
15  
16 ongoing community-based study of adult distance learning Sukhothai Thammathirat Open  
17  
18 University (STOU) students residing throughout the country. In 2005 the STOU student  
19  
20 register listed about 200,000 names and addresses: a baseline 20-page questionnaire was  
21  
22 sent to each student and 87,134 (44%) replied. The baseline characteristics of cohort  
23  
24 participants[7] and comparisons with the adult population of Thailand[8-9] have been  
25  
26 reported previously: the STOU cohort has a slightly higher proportion of females than the  
27  
28 general Thai population (54.7 vs. 50.5%); more young adults (51.5 vs. 23.9% were aged  
29  
30 between 21 and 30 years) and fewer people aged over 50 (2.0 vs. 24.7%)[8]; the age  
31  
32 distribution of the STOU cohort is shown in Figure 1. Study participants were also less likely  
33  
34 to be married and more likely to have completed junior high school; geographically the main  
35  
36 regions in Thailand are well represented in the STOU cohort[8].  
37  
38  
39  
40  
41  
42

43 Overall the cohort represents well the geo-demographic, ethnic, occupational and  
44  
45 socioeconomic status of the young-adult Thai population. This is because most Open  
46  
47 University students are unable to leave their locations to attend an on-campus university  
48  
49 fulltime: most already have established jobs and family responsibilities, and are of modest  
50  
51 economic circumstances. However, they are better educated than the general Thai  
52  
53 population and thus are able to respond to complex health questionnaires. In 2009, a  
54  
55 follow-up survey was sent and 60,569 (>70%) participants replied: 55% were women and  
56  
57  
58  
59  
60



1  
2  
3 the median age was 34 years (range 19 to 92). Data scanning, verifying, and correcting were  
4  
5 conducted using Scandevet, a program developed by a research team from Khon Kaen  
6  
7 University. Further data editing was completed using SQL and SPSS software.  
8  
9

#### 10 Ethical considerations

11  
12  
13  
14 Ethics approval was obtained from Sukhothai Thammathirat Open University Research and  
15  
16 Development Institute (protocol 0522/10) and the Australian National University Human  
17  
18 Research Ethics Committee (protocols 2004344 and 2009570). Informed written consent  
19  
20 was obtained from all participants.  
21  
22

#### 23 Measures

24  
25  
26  
27 The core question asked was “In your life have you ever experienced a fracture to the areas  
28  
29 of your body mentioned below? If so please place a cross in the Yes box and indicate the age  
30  
31 at which the fracture occurred” followed by a list: Finger/toe; wrist; arm; collarbone; rib;  
32  
33 skull; face/jaw/nose; neck; back; pelvis; leg; ankle; other. Skull fractures may have been  
34  
35 over-reported (by being confused with skull trauma due to the wording used in the original  
36  
37 Thai questionnaire) and as this is the subject of further investigation skull fractures are not  
38  
39 included in this report. Other variables included in this analysis are age and gender.  
40  
41

42  
43 Participant age was divided into bands of 10 years (21-30, 31-40, 41-50, 51-60 and 61-70).  
44  
45 Age-category analyses presented here excluded 7 cohort members aged less than 21 years  
46  
47 as they were too few in number to reliably represent that age group. Generally, age groups  
48  
49 with very small numbers of people in them were not presented in the age-specific results to  
50  
51 prevent distorting age effects. .  
52  
53  
54

#### 55 Analysis

1  
2  
3 Only fractures that were reported together with an age at the time of fracture were  
4  
5 included in the analysis. Lifetime prevalence of fractures was calculated as the percentage  
6  
7 of participants who reported ever having had a fracture. Lifetime incidence of fractures per  
8  
9 100,000 person-years was calculated by dividing the number of reported fractures by the  
10  
11 sum of the ages of all study participants, and multiplying by 100,000. Fracture incidence was  
12  
13 also calculated using a range of recall periods: for example, for a recall period of 10 years,  
14  
15 only fractures that were reported to have occurred within the last 10 years were included in  
16  
17 the incidence calculation, and the denominator was the number of study participants  
18  
19 multiplied by 10 (to account for 10 years of recall). Confidence intervals for the incidence  
20  
21 rates were calculated by first assuming fracture occurrence to have a Poisson distribution,  
22  
23 and finding its related confidence interval[10]. Differences in recall for leg vs. finger/toe  
24  
25 fractures were calculated using a Z-test for two proportions: the reported number of  
26  
27 fractures over 10 years divided by the expected number of fractures based on 1-year recall  
28  
29 multiplied by 10. All analyses were conducted using SAS software, version 9.2.  
30  
31  
32  
33  
34  
35

## 36 **Results**

37  
38 The 60569 Thai Cohort Study participants who responded to the 2009 survey reported a  
39  
40 total of 18280 lifetime fractures; age at the time of fractures was included for 18010 (99%)  
41  
42 of these. The overall lifetime prevalence of ever having sustained any fracture was 22%:  
43  
44 there were 47445 (78%) participants who did not report any fracture; 9964 (16%) who  
45  
46 reported a fracture at one site; 2146 (4%) who reported a fracture at two sites and 1014  
47  
48 (2%) who reported fractures at three or more sites. The distribution of the age-at-fracture  
49  
50 as well as the overall study participant age distribution is shown in Figure 1. Among  
51  
52 participants below the age of 40, women are in the majority; above 40 years men are in the  
53  
54  
55  
56  
57  
58  
59  
60

majority. Although there are more women than men in the study, 65% (11645/18010) of all fractures were reported by men. There was over-reporting of fractures at rounded ages such as 25, 30, 35 and 40 as well as 18 years (Figure 1, bottom); a more natural distribution can be achieved by using a 5-year interval scale.

Table 1. Lifetime prevalence of fractures in Thai cohort members by age and sex.

| Age group    | Lifetime prevalence of fractures       |                |                                        |                |
|--------------|----------------------------------------|----------------|----------------------------------------|----------------|
|              | Men                                    |                | Women                                  |                |
|              | Ever had a fracture / number of people | Prevalence (%) | Ever had a fracture / number of people | Prevalence (%) |
| 21-30        | 1833 / 6688                            | 27             | 1743 / 13003                           | 13             |
| 31-40        | 3527 / 11519                           | 31             | 2038 / 13174                           | 15             |
| 41-50        | 2128 / 6883                            | 31             | 948 / 5956                             | 16             |
| 51-60        | 588 / 1965                             | 30             | 197 / 943                              | 21             |
| 61-70        | 89 / 300                               | 30             | 18 / 74                                | 24             |
| <i>Total</i> | <i>8165 / 27355</i>                    | <i>30</i>      | <i>4944 / 33150</i>                    | <i>15</i>      |

The prevalence of fractures among men in their 20s and 30s was twice as high as that of women of the same age group (Table 1). Having sustained a fracture was more common among women in their 50s and 60s than among younger women; among men, there was no marked difference between the age groups.

Table 2. Fracture incidence calculated from lifetime fractures and from fractures reported for the last year only

| Fracture site | Lifetime fractures  |                   | Fractures in the last year |                   |
|---------------|---------------------|-------------------|----------------------------|-------------------|
|               | Number of fractures | Crude incidence * | Number of fractures        | Crude incidence † |
| Finger/toe    | 3519                | 163               | 268                        | 442               |
| Wrist         | 1995                | 92                | 98                         | 162               |
| Arm           | 2967                | 137               | 76                         | 125               |
| Collarbone    | 1571                | 73                | 62                         | 102               |
| Rib           | 514                 | 24                | 53                         | 88                |
| Face/Jaw/Nose | 1006                | 47                | 47                         | 78                |
| Neck          | 213                 | 10                | 21                         | 35                |
| Back          | 610                 | 28                | 73                         | 121               |
| Pelvis        | 270                 | 13                | 19                         | 31                |
| Leg           | 2007                | 93                | 108                        | 178               |
| Ankle         | 2051                | 95                | 171                        | 282               |
| Other         | 1287                | 60                | 134                        | 221               |
| <i>Total</i>  | <i>18010</i>        | <i>834</i>        | <i>1130</i>                | <i>1866</i>       |

\* Calculated over 2159580 person years. † Calculated over 60569 person years.

Note: Fracture incidence expressed per 100,000 person-years. The lifetime fracture crude incidence includes childhood fractures; the fractures in the last year do not (as the youngest study participant is 19 years).

The fracture incidence per 100,000 person years by fractures site is given in Table 2.

Finger/toe, arm and ankle fractures were the most common; pelvis and neck fractures the least common. Counting only fractures that occurred in the year prior to the survey resulted in a much higher fracture incidence for most fracture sites. Lifetime fracture incidence includes childhood fractures and relies on accurate recall over a lifetime; fractures over the last year, on the other hand, are derived from recent events, and because the youngest participants were 19 years, childhood fractures are not included.

1  
2  
3 This is further illustrated in Figure 2: calculating fracture incidence over a longer recall  
4  
5 period resulted in a lower fracture incidence; this effect is seen both in men and women,  
6  
7 and across all age groups. The decline in incidence when calculated over longer recall  
8  
9 periods is greater for less memorable fractures such as finger/toe, than for fractures  
10  
11 associated with greater inconvenience such as leg fractures. Based on the number of  
12  
13 fractures reported to have occurred in the last year, we can calculate the expected number  
14  
15 for a 10-year period of recall and then compare this to the actual reported number. For  
16  
17 finger/toe fractures, the reported number was 55% (95% CI 54 to 57) of the expected, and  
18  
19 for leg fractures the corresponding number was 65% (95%CI 62 to 67). Assuming steady  
20  
21 fracture rates over time, the 10-year recall was statistically significantly lower for finger/toe  
22  
23 than for leg fractures.  
24  
25  
26  
27  
28

29  
30 Because the fracture incidence declined when calculated over increasing length of recall, for  
31  
32 further analyses only fractures reported to have occurred in the last year were used.  
33

34 Fracture incidence per age group for men and women is shown in Figure 3: fractures were  
35  
36 more common among young men than among young women; with increasing age, among  
37  
38 men the fracture incidence decreased whereas among women fracture incidence increased.  
39  
40 Among women above 50 years, fracture incidence was higher than that among men of  
41  
42 above 50 years.  
43  
44  
45  
46  
47  
48  
49  
50  
51  
52  
53  
54  
55  
56  
57  
58  
59  
60

## Discussion

This study reports the fracture incidence among Thais aged between 20 and 60 years.

Fractures are common, particularly among men under 40 and women above 50 years.

The results of the present study indicate a progressive decline in recall-based fracture incidence over an increasing number of years. Although this pattern appears to be general across age and gender, the magnitude of 'recall inaccuracy' also depends on the severity of the event, with leg fractures being recalled much more accurately than finger/toe fractures. These results, however, should be interpreted with caution as the decline in incidence with increasing recall period could in part be explained by a real increase in fracture incidence over time. Thailand is transitioning to a modern consumer economy[9] which could be leading to an increase in fractures due to traffic injury. Baseline frequencies of transport[11] and other injuries[12] from the 2005 survey of the Thai Cohort Study have been reported; a change in injury incidence and fracture incidence over time is a topic for further study. Regardless of the underlying change over time, using only the last year of recall to calculate incidence is the most accurate and timely representation of fracture incidence; furthermore, it facilitates comparisons with other studies reporting 12-months recall of fractures.

The overall fracture incidence recorded in the present study is by and large comparable to previous studies that were based on medical records and X-ray reports: some studies reported lower incidence[1, 13-15] and others reported similar rates[3-4, 16]. A recent UK study using a self-report survey reported a fracture incidence twice as high as that presented in this Thai study[5]: whether this reflects higher fracture rates or better recall in the UK remains to be investigated.

1  
2  
3 The increase in the incidence of fractures between the ages of 20 and 60 among women and  
4  
5 the simultaneous decrease among men seen in this Thai study have been reported  
6  
7 previously in studies from the UK[1, 4-5], US[2], and Norway[3]. Men in their 20s have  
8  
9 previously been reported to have a much higher incidence of fractures than women: this  
10  
11 gender difference gradually disappears with age[1-5, 14], as also seen in the present Thai  
12  
13 study.  
14  
15

16  
17  
18 The pattern of fracture incidence among adult Thais presented here differs from reports  
19  
20 from Western studies in two ways. First, the age of onset of a steep increase in fracture  
21  
22 rates among women is manifest among the 51-60 year old Thais, but in reports from  
23  
24 Western countries[4, 13, 16] a steep increase is not apparent until after the age of 65-70  
25  
26 years. This steep increase among older women generally reflects osteoporosis: the present  
27  
28 results could therefore indicate earlier onset of osteoporosis among Thai women. This is in  
29  
30 agreement with a 2001 study of age-specific osteoporosis prevalence among Thai women  
31  
32 which showed that prevalence increased steeply between the ages of 50 and 59 years[17].  
33  
34 The second discrepancy is the observed decrease in fractures between the ages of 40 and 60  
35  
36 among Thai men. Possibly the decrease in fracture rates after age 20-25 seen among  
37  
38 Western men[3, 14] is not manifest among Thai men until much later because of continued  
39  
40 high-risk physical labour; the decrease in fractures after the age of 40 in Thai men could  
41  
42 reflect a transitioning out of high-risk work around that age.  
43  
44  
45  
46  
47  
48

49 This study has several limitations. **First, the fracture incidence derived from the Thai Cohort**  
50  
51 **Study 2009 survey is not representative of the Thai population. However the Thai Cohort Study**  
52  
53 **is a large nation-wide study and the participants represent well the socioeconomic status of the**  
54  
55 **young Thai population. The variations in fracture rates by age and gender observed by internal**  
56  
57  
58  
59  
60

1  
2  
3 comparisons in the Thai Cohort Study participants are therefore likely to reflect fracture rate  
4  
5 patterns in the general young-adult Thai population. Because fracture incidence is generally  
6  
7 described as two-peaked, with greatest incidence in the young and the elderly[1-3, 5], the  
8  
9 fracture incidence presented in this study is an under-estimate of that of the general Thai  
10  
11 population, as the young (<20) are not represented and the elderly (61+, n=431) are under-  
12  
13 represented. The findings of this study are therefore limited to Thais between the ages of 20  
14  
15 and 60.  
16  
17

18  
19  
20 **Second, the study relies entirely on self-report of recalled fractures.** A comparison of self-  
21  
22 report with X-ray reports (the gold standard) was not feasible. Instead, we have attempted  
23  
24 to quantify self-report (in-) accuracy in two other ways: first, by showing over-reporting of  
25  
26 fractures at rounded ages (Fig. 1). This phenomenon distorts the time distribution rather  
27  
28 than the overall number of reported events. The second self-report inaccuracy we have  
29  
30 quantified is fall-off over time. Recent events were recalled more accurately than events  
31  
32 that occurred longer ago.  
33  
34  
35

## 36 37 **Conclusions**

38  
39 Self-report surveys provide a feasible alternative to hospital-records and X-ray records  
40  
41 research for establishing fracture incidence; however, when lifetime fractures are reported,  
42  
43 using only fractures reported to have occurred in the last year minimises bias due to poor  
44  
45 recall. The results of this study indicate that the pattern of fracture incidence among adult  
46  
47 Thai Cohort Study participants between 20 and 60 years is similar to that reported for  
48  
49 Western countries such as the US and the UK. Overall, we see fracture in Thailand is a larger  
50  
51 burden for younger men and older women but we need more background information  
52  
53 before we can understand better the environmental and personal factors that account for  
54  
55  
56  
57  
58  
59  
60



1  
2  
3 this age and sex pattern of occurrence. Such analyses will be the focus of future reports  
4  
5 from the Thai Cohort Study.  
6  
7

### 8 9 **Competing Interests**

10  
11 The authors declare that they have no competing interests.  
12  
13

### 14 15 **Authors' contributions**

16  
17 JG and RM analysed the data and conceptualized and drafted the manuscript. SS and AS  
18  
19 designed and instituted the Thai Health-Risk Transition research project and helped the data  
20  
21 analysis and interpretation for this report. All authors read and approved the final  
22  
23 manuscript.  
24  
25

### 26 27 **Funding**

28  
29 This work was supported by the International Collaborative Research Grants Scheme with  
30  
31 joint grants from the Wellcome Trust UK (GR071587MA) and the Australian National Health  
32  
33 and Medical Research Council (NHMRC)(268055), and as a global health grant from the  
34  
35 NHMRC (585426). We thank the staff at Sukhothai Thammathirat Open University (STOU)  
36  
37 who assisted with student contact and the STOU students who are participating in the  
38  
39 cohort study. We also thank Dr Bandit Thinkamrop and his team from Khon Kaen University  
40  
41 for guiding us successfully through the complex data processing.  
42  
43  
44  
45

### 46 47 **References**

- 48  
49 1. Donaldson LJ, Cook A, Thomson RG. Incidence of fractures in a geographically defined  
50  
51 population. *J Epidemiol Community Health* 1990;44:241-5.  
52  
53  
54 2. Fife D, Barancik JI. Northeastern Ohio Trauma Study III: incidence of fractures. *Ann Emerg*  
55  
56 *Med* 1985;14:244-8.  
57  
58  
59  
60

- 1  
2  
3 3. Sahlin Y. Occurrence of fractures in a defined population: a 1-year study. *Injury* 1990;21:158-  
4  
5 60.  
6
- 7  
8 4. Johansen A, Evans RJ, Stone MD, et al. Fracture incidence in England and Wales: a study  
9  
10 based on the population of Cardiff. *Injury* 1997;28:655-60.  
11
- 12  
13 5. Donaldson LJ, Reckless IP, Scholes S, et al. The epidemiology of fractures in England. *J*  
14  
15 *Epidemiol Community Health* 2008;62:174-80.  
16
- 17  
18 6. Pachana NA, Brilleman SL, Dobson AJ. Reporting of life events over time: Methodological  
19  
20 issues in a longitudinal sample of women. *Psychol Assess* 2011;23:277-81.  
21
- 22  
23 7. Seubsman SA, Lim LL, Banwell C, et al. Socioeconomic status, sex, and obesity in a large  
24  
25 national cohort of 15-87-year-old open university students in Thailand. *J Epidemiol* 2010;20:13-20.  
26
- 27  
28 8. Seubsman SA, Yiengprugsawan V, Sleigh A. A large national Thai Cohort Study of the Health-  
29  
30 Risk Transition based on Sukhothai Thammathirat Open University students. *ASEAN Journal of Open*  
31  
32 *Distance Learning* 2010.  
33
- 34  
35 9. Sleigh AC, Seubsman SA, Bain C. Cohort profile: The Thai Cohort of 87,134 Open University  
36  
37 students. *Int J Epidemiol* 2008;37:266-72.  
38
- 39  
40 10. Altman DGM, D.; Bryant, T.N.; Gardner, M.J., editor. *Statistics with confidence*. 2nd ed.  
41  
42 Bristol: BMJ Books; 2000.  
43
- 44  
45 11. Stephan K, Kelly M, McClure R, et al. Distribution of transport injury and related risk  
46  
47 behaviours in a large national cohort of Thai adults. *Accid Anal Prev* 2011;43:1062-7.  
48
- 49  
50 12. Stephan K, McClure R, Seubsman SA, et al. Review of injuries over a one year period among  
51  
52 87,134 adults studying at an open university in Thailand. *Southeast Asian J Trop Med Public Health*  
53  
54 2010;41:1220-30.  
55  
56  
57  
58  
59  
60

- 1  
2  
3 13. Cooley H, Jones G. A population-based study of fracture incidence in southern Tasmania:  
4  
5 lifetime fracture risk and evidence for geographic variations within the same country. *Osteoporos Int*  
6  
7 2001;12:124-30.  
8  
9  
10 14. Jones G, Cooley HM. Symptomatic fracture incidence in those under 50 years of age in  
11  
12 southern Tasmania. *J Paediatr Child Health* 2002;38:278-83.  
13  
14  
15 15. Sanders KM, Seeman E, Ugoni AM, et al. Age- and gender-specific rate of fractures in  
16  
17 Australia: a population-based study. *Osteoporos Int* 1999;10:240-7.  
18  
19  
20 16. Melton LJ, 3rd, Crowson CS, O'Fallon WM. Fracture incidence in Olmsted County, Minnesota:  
21  
22 comparison of urban with rural rates and changes in urban rates over time. *Osteoporos Int*  
23  
24 1999;9:29-37.  
25  
26  
27  
28 17. Limpaphayom KK, Taechakraichana N, Jaisamrarn U, et al. Prevalence of osteopenia and  
29  
30 osteoporosis in Thai women. *Menopause* 2001;8:65-9.  
31  
32  
33  
34  
35  
36  
37  
38  
39  
40  
41  
42  
43  
44  
45  
46  
47  
48  
49  
50  
51  
52  
53  
54  
55  
56  
57  
58  
59  
60

1  
2  
3 Figure Legends  
4  
5  
6  
7

8 Figure 1. Top: Histogram of Thai Cohort Study participant age. Bottom: Histogram of the  
9 total lifetime fractures reported by Thai Cohort Study participants: over-reporting of  
10 fractures can be seen at ages such as 10, 15, 18, 25, 30, 35 and 40  
11  
12  
13

14  
15  
16  
17 Figure 2. Fracture incidence calculated using a recall period of 1 through to 10 years. Results  
18 are shown for fractures that were reported to occur between the ages 20 to 30, 30 to 40  
19 and 40 to 50.  
20  
21  
22  
23

24  
25  
26  
27 Figure 3. Overall fracture incidence for men and women for a recall period of one year. Error  
28 bars represent 95% confidence intervals.  
29  
30  
31  
32  
33  
34  
35  
36

### 37 **Authors' contributions**

38 JG and RM analysed the data and conceptualized and drafted the manuscript. SS and AS designed  
39 and instituted the Thai Health-Risk Transition research project and helped the data analysis and  
40 interpretation for this report. All authors read and approved the final manuscript.  
41  
42  
43  
44  
45  
46  
47  
48  
49  
50  
51  
52  
53  
54  
55  
56  
57  
58  
59  
60

1  
2  
3  
4  
5  
6  
7  
8  
9  
10  
11  
12  
13  
14  
15  
16  
17  
18  
19  
20  
21  
22  
23  
24  
25  
26  
27  
28  
29  
30  
31  
32  
33  
34  
35  
36  
37  
38  
39  
40  
41  
42  
43  
44  
45  
46  
47  
48  
49  
50  
51  
52  
53  
54  
55  
56  
57  
58  
59  
60



Figure 1. Top: Histogram of Thai Cohort Study participant age. Bottom: Histogram of the total lifetime fractures reported by Thai Cohort Study participants: over-reporting of fractures can be seen at ages such as 10, 15, 18, 25, 30, 35 and 40  
176x222mm (300 x 300 DPI)



Figure 2. Fracture incidence calculated using a recall period of 1 through to 10 years. Results are shown for fractures that were reported to occur between the ages 20 to 30, 30 to 40 and 40 to 50.  
173x210mm (150 x 150 DPI)



Figure 3. Overall fracture incidence for men and women for a recall period of one year. Error bars represent 95% confidence intervals.

160x124mm (150 x 150 DPI)

**STROBE 2007 (v4) checklist of items to be included in reports of observational studies in epidemiology\***  
**Checklist for cohort, case-control, and cross-sectional studies (combined)**

| Section/Topic             | Item # | Recommendation                                                                                                                                                                                                                                                                                                                                                                                                                                                         | Reported on page # |
|---------------------------|--------|------------------------------------------------------------------------------------------------------------------------------------------------------------------------------------------------------------------------------------------------------------------------------------------------------------------------------------------------------------------------------------------------------------------------------------------------------------------------|--------------------|
| Title and abstract        | 1      | (a) Indicate the study's design with a commonly used term in the title or the abstract                                                                                                                                                                                                                                                                                                                                                                                 | 5                  |
|                           |        | (b) Provide in the abstract an informative and balanced summary of what was done and what was found                                                                                                                                                                                                                                                                                                                                                                    | 5                  |
| <b>Introduction</b>       |        |                                                                                                                                                                                                                                                                                                                                                                                                                                                                        |                    |
| Background/rationale      | 2      | Explain the scientific background and rationale for the investigation being reported                                                                                                                                                                                                                                                                                                                                                                                   | 6                  |
| Objectives                | 3      | State specific objectives, including any pre-specified hypotheses                                                                                                                                                                                                                                                                                                                                                                                                      | 6                  |
| <b>Methods</b>            |        |                                                                                                                                                                                                                                                                                                                                                                                                                                                                        |                    |
| Study design              | 4      | Present key elements of study design early in the paper                                                                                                                                                                                                                                                                                                                                                                                                                | 8                  |
| Setting                   | 5      | Describe the setting, locations, and relevant dates, including periods of recruitment, exposure, follow-up, and data collection                                                                                                                                                                                                                                                                                                                                        | 8                  |
| Participants              | 6      | (a) <i>Cohort study</i> —Give the eligibility criteria, and the sources and methods of selection of participants. Describe methods of follow-up<br><i>Case-control study</i> —Give the eligibility criteria, and the sources and methods of case ascertainment and control selection. Give the rationale for the choice of cases and controls<br><i>Cross-sectional study</i> —Give the eligibility criteria, and the sources and methods of selection of participants | 7                  |
|                           |        | (b) <i>Cohort study</i> —For matched studies, give matching criteria and number of exposed and unexposed<br><i>Case-control study</i> —For matched studies, give matching criteria and the number of controls per case                                                                                                                                                                                                                                                 |                    |
| Variables                 | 7      | Clearly define all outcomes, exposures, predictors, potential confounders, and effect modifiers. Give diagnostic criteria, if applicable                                                                                                                                                                                                                                                                                                                               | 8-9                |
| Data sources/ measurement | 8*     | For each variable of interest, give sources of data and details of methods of assessment (measurement). Describe comparability of assessment methods if there is more than one group                                                                                                                                                                                                                                                                                   | 8-9                |
| Bias                      | 9      | Describe any efforts to address potential sources of bias                                                                                                                                                                                                                                                                                                                                                                                                              | 9                  |
| Study size                | 10     | Explain how the study size was arrived at                                                                                                                                                                                                                                                                                                                                                                                                                              | 7                  |
| Quantitative variables    | 11     | Explain how quantitative variables were handled in the analyses. If applicable, describe which groupings were chosen and why                                                                                                                                                                                                                                                                                                                                           | 7-9                |
| Statistical methods       | 12     | (a) Describe all statistical methods, including those used to control for confounding                                                                                                                                                                                                                                                                                                                                                                                  | 9                  |
|                           |        | (b) Describe any methods used to examine subgroups and interactions                                                                                                                                                                                                                                                                                                                                                                                                    | 9                  |
|                           |        | (c) Explain how missing data were addressed                                                                                                                                                                                                                                                                                                                                                                                                                            | 9                  |
|                           |        | (d) <i>Cohort study</i> —If applicable, explain how loss to follow-up was addressed<br><i>Case-control study</i> —If applicable, explain how matching of cases and controls was addressed                                                                                                                                                                                                                                                                              | n/a                |



|                          |     |                                                                                                                                                                                                              |       |
|--------------------------|-----|--------------------------------------------------------------------------------------------------------------------------------------------------------------------------------------------------------------|-------|
|                          |     | <i>Cross-sectional study</i> —If applicable, describe analytical methods taking account of sampling strategy                                                                                                 |       |
|                          |     | (e) Describe any sensitivity analyses                                                                                                                                                                        | 9     |
| <b>Results</b>           |     |                                                                                                                                                                                                              |       |
| Participants             | 13* | (a) Report numbers of individuals at each stage of study—eg numbers potentially eligible, examined for eligibility, confirmed eligible, included in the study, completing follow-up, and analysed            | 9-10  |
|                          |     | (b) Give reasons for non-participation at each stage                                                                                                                                                         | n/a   |
|                          |     | (c) Consider use of a flow diagram                                                                                                                                                                           | -     |
| Descriptive data         | 14* | (a) Give characteristics of study participants (eg demographic, clinical, social) and information on exposures and potential confounders                                                                     | 9-10  |
|                          |     | (b) Indicate number of participants with missing data for each variable of interest                                                                                                                          | 9     |
|                          |     | (c) <i>Cohort study</i> —Summarise follow-up time (eg, average and total amount)                                                                                                                             | -     |
| Outcome data             | 15* | <i>Cohort study</i> —Report numbers of outcome events or summary measures over time                                                                                                                          | -     |
|                          |     | <i>Case-control study</i> —Report numbers in each exposure category, or summary measures of exposure                                                                                                         |       |
|                          |     | <i>Cross-sectional study</i> —Report numbers of outcome events or summary measures                                                                                                                           | 9-10  |
| Main results             | 16  | (a) Give unadjusted estimates and, if applicable, confounder-adjusted estimates and their precision (eg, 95% confidence interval). Make clear which confounders were adjusted for and why they were included |       |
|                          |     | (b) Report category boundaries when continuous variables were categorized                                                                                                                                    | 9-11  |
|                          |     | (c) If relevant, consider translating estimates of relative risk into absolute risk for a meaningful time period                                                                                             |       |
| Other analyses           | 17  | Report other analyses done—eg analyses of subgroups and interactions, and sensitivity analyses                                                                                                               | 9-11  |
| <b>Discussion</b>        |     |                                                                                                                                                                                                              |       |
| Key results              | 18  | Summarise key results with reference to study objectives                                                                                                                                                     | 10    |
| Limitations              | 19  | Discuss limitations of the study, taking into account sources of potential bias or imprecision. Discuss both direction and magnitude of any potential bias                                                   | 13-14 |
| Interpretation           | 20  | Give a cautious overall interpretation of results considering objectives, limitations, multiplicity of analyses, results from similar studies, and other relevant evidence                                   | 15    |
| Generalisability         | 21  | Discuss the generalisability (external validity) of the study results                                                                                                                                        | 14    |
| <b>Other information</b> |     |                                                                                                                                                                                                              |       |
| Funding                  | 22  | Give the source of funding and the role of the funders for the present study and, if applicable, for the original study on which the present article is based                                                | 15-16 |

\*Give information separately for cases and controls in case-control studies and, if applicable, for exposed and unexposed groups in cohort and cross-sectional studies.

**Note:** An Explanation and Elaboration article discusses each checklist item and gives methodological background and published examples of transparent reporting. The STROBE checklist is best used in conjunction with this article (freely available on the Web sites of PLoS Medicine at <http://www.plosmedicine.org/>, Annals of Internal Medicine at <http://www.annals.org/>, and Epidemiology at <http://www.epidem.com/>). Information on the STROBE Initiative is available at [www.strobe-statement.org](http://www.strobe-statement.org).
